# Supplementary material for: Genome-Wide Analysis Reveals Novel Genes Essential for Heme Homeostasis in Caenorhabditis elegans
Source: PubMed Central journal article supplement (PMC2912396; doi:10.1371/journal.pgen.1001044), 2010-07-29

# A

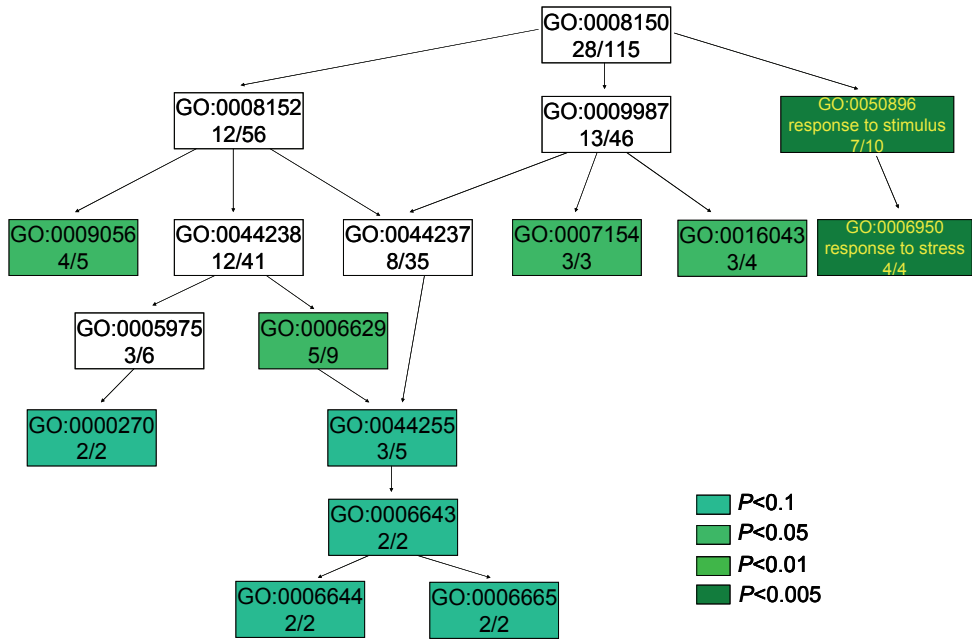

**B**

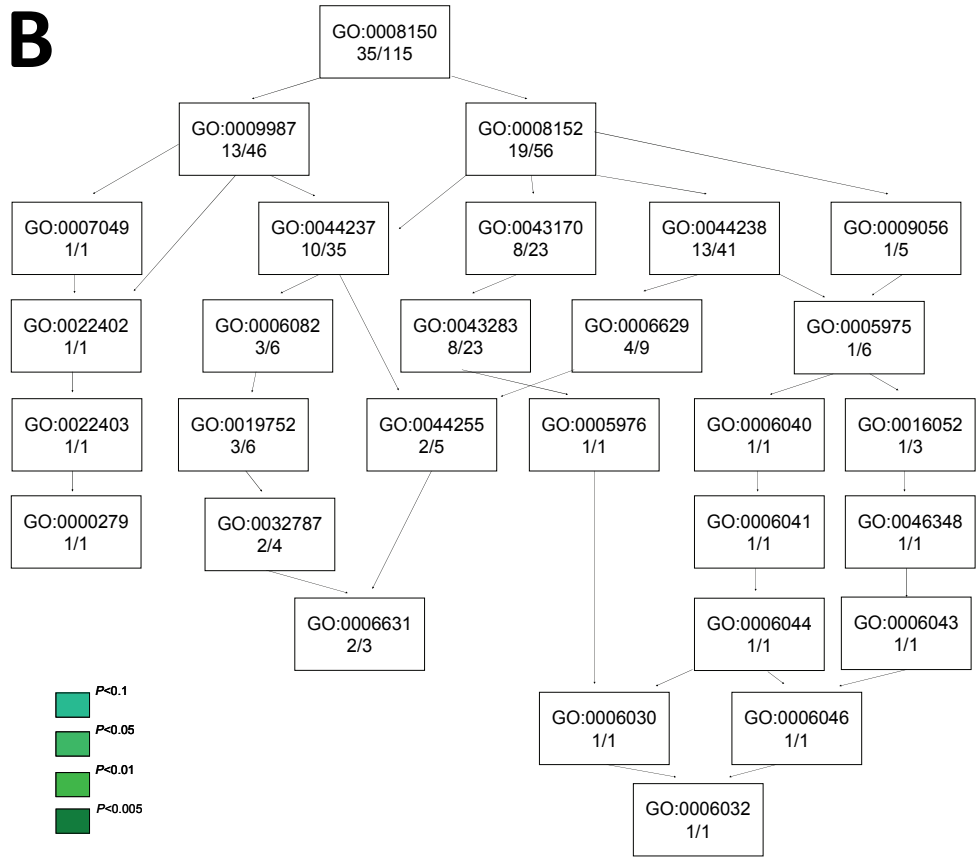

C

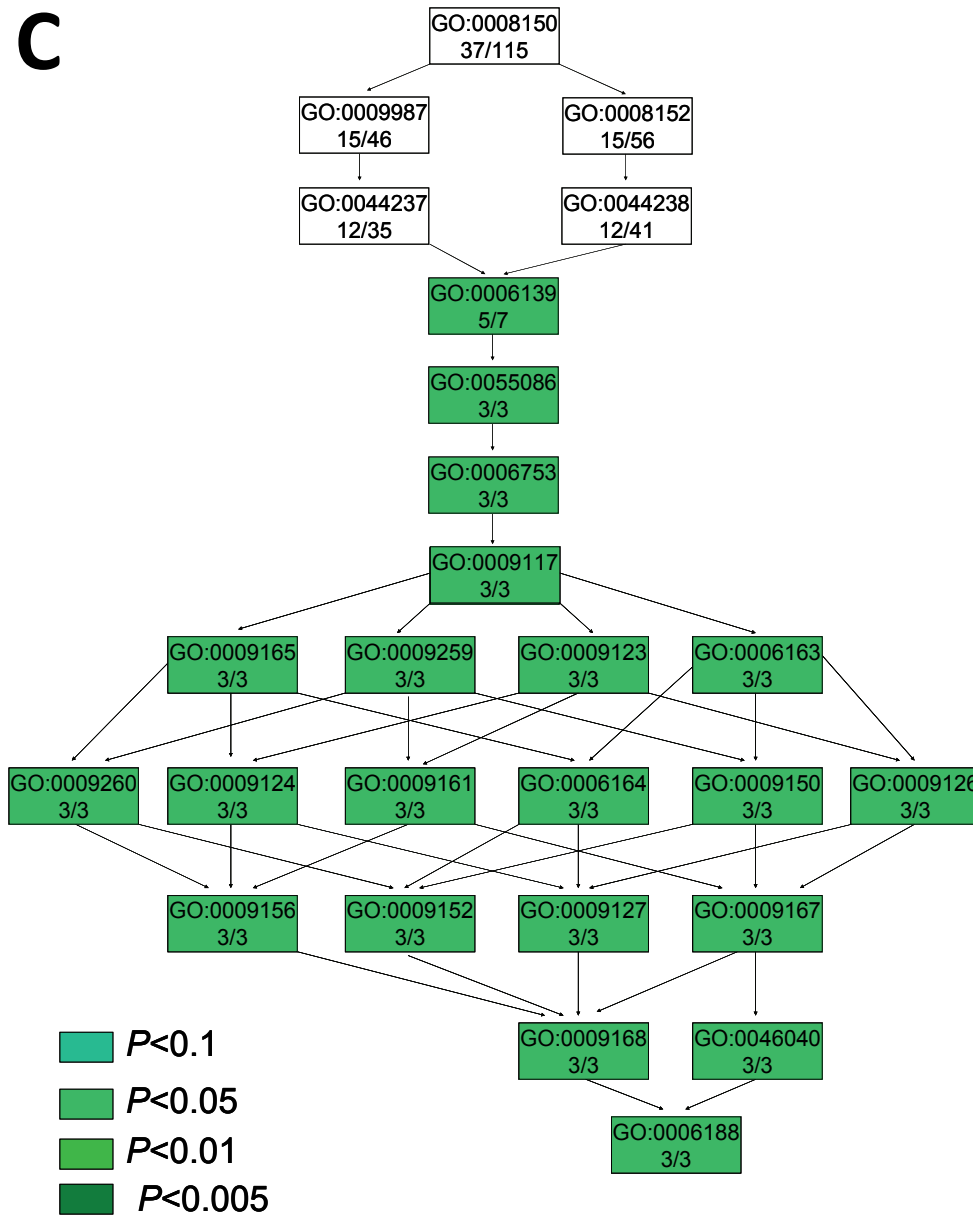

Supplement: pgen.1001044.s002.pdf [file pgen.1001044.s002.pdf]
