# Supplementary material for: Genome-Wide Analysis Reveals Novel Genes Essential for Heme Homeostasis in Caenorhabditis elegans
Source: PubMed Central journal article supplement (PMC2912396; doi:10.1371/journal.pgen.1001044), 2010-07-29
Supplement: pgen.1001044.s003.pdf [file pgen.1001044.s003.pdf]

| Description | Gene name       | 4μM   | 500μM | 4μM | 500μM |
|-------------|-----------------|-------|-------|-----|-------|
| C08F11.11   |                 | 1.62  | -2.02 | up  | down  |
| C15C8.3     |                 | 16.57 | -2.25 | up  | down  |
| C44B7.5     |                 | 3.78  | -2.14 | up  | down  |
| EED8.3      |                 | 2.00  | -5.55 | up  | down  |
| F36H1.5     | <i>hrg-4</i>    | 9.19  | -1.81 | up  | down  |
| F57C2.4     |                 | 2.94  | -2.64 | up  | down  |
| F58E6.8     |                 | 12.73 | -2.40 | up  | down  |
| F58G6.3     |                 | 2.75  | -1.80 | up  | down  |
| F59D8.1     | <i>vit-3</i>    | 4.35  | -1.74 | up  | down  |
| K09F5.2     | <i>vit-1</i>    | 1.65  | -1.80 | up  | down  |
| W07B8.1     |                 | 5.86  | -1.91 | up  | down  |
| Y62H9A.6    |                 | 2.83  | -8.36 | up  | down  |
| ZK813.1     |                 | 3.74  | -3.37 | up  | down  |
| C01G6.3     |                 | 3.62  | -0.34 | up  |       |
| C04F6.1     |                 | 1.74  | -0.47 | up  |       |
| C05E7.2     |                 | 1.74  | 1.35  | up  |       |
| C08B6.1     |                 | 1.84  | 0.19  | up  |       |
| C10G8.4     |                 | 4.20  | 1.51  | up  |       |
| C16C4.4     | <i>math-14</i>  | 36.92 | -1.33 | up  |       |
| C25A1.8     | <i>clcc-87</i>  | 2.15  | 0.35  | up  |       |
| C29E4.7     | <i>gst-1</i>    | 12.15 | -1.32 | up  |       |
| C31C9.1     | <i>tag-10</i>   | 4.59  | -0.49 | up  |       |
| C33A12.6    | <i>ugt-21</i>   | 2.87  | 1.14  | up  |       |
| C33H5.13    |                 | 1.62  | 1.39  | up  |       |
| C42D4.3     |                 | 1.93  | 1.39  | up  |       |
| C42D8.2     |                 | 2.62  | -0.71 | up  |       |
| C44B12.1    |                 | 3.14  | -1.03 | up  |       |
| C50H11.15   | <i>cyp-33C9</i> | 2.94  | 1.26  | up  |       |
| C54D10.1    | <i>cdr-2</i>    | 1.66  | 1.53  | up  |       |
| C54F6.14    | <i>ftn-1</i>    | 1.66  | 0.88  | up  |       |
| D1054.10    |                 | 3.28  | -1.44 | up  |       |
| F07C4.2     | <i>clcc-45</i>  | 3.51  | 0.48  | up  |       |
| F07C4.9     | <i>clcc-46</i>  | 2.93  | 0.53  | up  |       |
| F07F6.5     | <i>dct-5</i>    | 1.68  | 1.35  | up  |       |
| F11G11.3    | <i>gst-6</i>    | 1.88  | 1.59  | up  |       |
| F14F4.3     | <i>mrp-5</i>    | 3.48  | 0.38  | up  |       |
| F15B9.6     |                 | 4.78  | 1.49  | up  |       |
| F17E9.4     |                 | 3.78  | -0.79 | up  |       |
| F18A12.4    |                 | 10.87 | 0.15  | up  |       |
| F26F12.1    |                 | 1.72  | -0.54 | up  |       |
| F32H5.1     |                 | 3.14  | 0.36  | up  |       |
| F32H5.3     |                 | 2.00  | 1.49  | up  |       |
| F35B3.4     |                 | 2.14  | 1.48  | up  |       |
| F36A2.3     |                 | 1.93  | 0.33  | up  |       |
| F38A3.1     | <i>col-81</i>   | 1.68  | -0.48 | up  |       |
| F41F3.4     | <i>col-139</i>  | 1.61  | -0.25 | up  |       |
| F42G2.2     |                 | 2.30  | 1.18  | up  |       |
| F44G3.2     |                 | 1.80  | -1.18 | up  |       |
| F47C10.2    | <i>btb-21</i>   | 2.07  | 1.39  | up  |       |
| F48E3.4     |                 | 1.80  | -0.79 | up  |       |
| F52E1.1     | <i>pos-1</i>    | 2.00  | -0.44 | up  |       |
| F58E6.4     |                 | 2.20  | 0.13  | up  |       |
| F59D6.3     |                 | 2.22  | -0.66 | up  |       |
| F59D8.2     | <i>vit-4</i>    | 5.80  | -1.34 | up  |       |
| H23N18.1    | <i>ugt-13</i>   | 1.77  | -0.17 | up  |       |
| K01D12.9    |                 | 2.07  | 0.85  | up  |       |
| K02B9.1     | <i>meg-1</i>    | 3.07  | -1.10 | up  |       |
| K07H8.6     | <i>vit-6</i>    | 4.45  | -0.88 | up  |       |
| K10B2.2     |                 | 2.84  | 0.25  | up  |       |
| K10D11.1    | <i>dod-17</i>   | 1.68  | 0.62  | up  |       |
| M02H5.4     | <i>nhr-202</i>  | 2.30  | 1.24  | up  |       |
| R02E12.6    | <i>hrg-1</i>    | 16.04 | 0.33  | up  |       |
| R06C7.4     | <i>cpg-3</i>    | 1.87  | 0.20  | up  |       |
| R193.2      |                 | 2.82  | -0.35 | up  |       |
| T02G5.11    |                 | 1.96  | 0.33  | up  |       |
| T04G9.7     |                 | 2.94  | -0.63 | up  |       |
| T05A1.2     | <i>col-122</i>  | 1.81  | -0.74 | up  |       |
| T11F9.3     | <i>nas-20</i>   | 1.87  | -0.88 | up  |       |
| T18H9.1     | <i>grd-6</i>    | 1.87  | 1.86  | up  |       |
| T21C9.13    |                 | 2.94  | -0.54 | up  |       |
| T21F4.1     |                 | 1.80  | 1.43  | up  |       |
| T28C12.6    |                 | 1.80  | 1.57  | up  |       |

| Description | Gene name        | 4μM    | 500μM | 4μM  | 500μM |
|-------------|------------------|--------|-------|------|-------|
| W02G9.4     |                  | 1.68   | 0.33  | up   |       |
| W03G11.1    | <i>col-181</i>   | 1.71   | -0.51 | up   |       |
| Y37D8A.19   |                  | 4.45   | -0.68 | up   |       |
| Y54G11A.7   |                  | 3.62   | 0.36  | up   |       |
| Y62H9A.4    |                  | 4.66   | 0.66  | up   |       |
| Y73F8A.9    | <i>pqn-91</i>    | 1.74   | 0.59  | up   |       |
| ZC373.2     |                  | 4.01   | -0.77 | up   |       |
| ZK1193.1    | <i>col-19</i>    | 2.28   | -0.22 | up   |       |
| ZK742.3     |                  | 2.55   | 1.55  | up   |       |
| B0218.8     | <i>clec-52</i>   | -14.84 | 2.10  | down | up    |
| C17F4.7     |                  | -1.91  | 1.82  | down | up    |
| F08G5.6     |                  | -2.07  | 4.33  | down | up    |
| F21F8.4     |                  | -2.65  | 1.70  | down | up    |
| F55G11.4    |                  | -1.88  | 4.98  | down | up    |
| T24B8.5     |                  | -3.22  | 5.59  | down | up    |
| Y46C8AL.2   | <i>clec-174</i>  | -1.76  | 3.69  | down | up    |
| Y46C8AL.5   | <i>clec-72</i>   | -1.69  | 2.04  | down | up    |
| Y46D2A.2    |                  | -1.76  | 2.05  | down | up    |
| ZK666.6     | <i>clec-60</i>   | -3.49  | 2.73  | down | up    |
| D1086.3     |                  | -1.87  | -1.41 | down |       |
| F28H7.3     |                  | -1.68  | 0.52  | down |       |
| F32A5.5     | <i>aqp-1</i>     | -1.74  | -1.30 | down |       |
| F46B6.8     |                  | -2.94  | 0.49  | down |       |
| F47G9.3     | <i>cutt-18</i>   | -1.94  | -1.29 | down |       |
| F49E12.9    |                  | -1.87  | 1.37  | down |       |
| F54D5.8     | <i>dnj-13</i>    | -1.68  | -1.42 | down |       |
| F54F3.3     |                  | -3.26  | 1.60  | down |       |
| F58B3.3     | <i>lys-6</i>     | -2.00  | -1.02 | down |       |
| F59B10.5    |                  | -1.62  | -1.39 | down |       |
| H40L08.2    |                  | -2.23  | 0.38  | down |       |
| K07E3.1     |                  | -1.68  | -1.23 | down |       |
| K10C2.3     |                  | -3.14  | -1.49 | down |       |
| M60.2       |                  | -2.02  | 0.36  | down |       |
| R09B5.4     | <i>fpn-1.2</i>   | -1.88  | -0.46 | down |       |
| R13H4.3     |                  | -1.62  | 0.36  | down |       |
| T07C4.4     | <i>spp-1</i>     | -1.80  | -0.44 | down |       |
| T08A9.8     | <i>spp-4</i>     | -1.80  | -0.41 | down |       |
| T10E9.8     |                  | -1.63  | -1.49 | down |       |
| T16G1.7     |                  | -2.07  | -0.36 | down |       |
| W03G1.7     |                  | -5.25  | -0.10 | down |       |
| W04E12.8    | <i>clec-50</i>   | -1.68  | 1.13  | down |       |
| Y19D10B.7   |                  | -2.01  | -0.31 | down |       |
| Y37A1A.2    |                  | -2.02  | -0.55 | down |       |
| Y37D8A.4    |                  | -1.75  | -1.52 | down |       |
| Y46G5A.29   |                  | -1.75  | -1.58 | down |       |
| Y46H3A.2    | <i>hsp-16.41</i> | -1.80  | -0.08 | down |       |
| Y46H3A.3    | <i>hsp-16.2</i>  | -1.74  | -0.09 | down |       |
| Y51H4A.5    |                  | -11.33 | -0.74 | down |       |
| Y54F10AM.6  |                  | -1.75  | -0.64 | down |       |
| Y5H2A.1     |                  | -2.02  | -1.40 | down |       |
| ZK377.1     | <i>wrt-6</i>     | -1.96  | -1.59 | down |       |
| ZK455.4     | <i>asm-2</i>     | -1.80  | 1.13  | down |       |
| C04H5.7     |                  | 2.80   | 5.78  | up   | up    |
| C24F3.3     | <i>nas-12</i>    | 3.05   | 1.83  | up   | up    |
| C32H11.10   | <i>dod-21</i>    | 2.42   | 7.04  | up   | up    |
| C34H4.2     |                  | 1.81   | 1.86  | up   | up    |
| F02D8.4     |                  | 1.76   | 1.70  | up   | up    |
| F08F8.5     | <i>numr-1</i>    | 7.66   | 8.23  | up   | up    |
| F21H7.1     | <i>gst-22</i>    | 1.63   | 2.42  | up   | up    |
| F35C5.9     | <i>clec-66</i>   | 1.93   | 2.08  | up   | up    |
| F49F1.6     |                  | 3.32   | 10.71 | up   | up    |
| F54E2.1     |                  | 2.22   | 1.70  | up   | up    |
| F58E6.7     |                  | 71.25  | 1.66  | up   | up    |
| K01D12.14   | <i>cdr-5</i>     | 72.08  | 3.79  | up   | up    |
| K02E2.4     | <i>ins-35</i>    | 1.63   | 3.09  | up   | up    |
| K08B4.3     | <i>ugt-19</i>    | 2.93   | 2.11  | up   | up    |
| K11H12.4    |                  | 1.93   | 1.71  | up   | up    |
| M02F4.7     | <i>clec-265</i>  | 2.16   | 2.86  | up   | up    |
| R10D12.9    |                  | 1.64   | 2.48  | up   | up    |
| R186.1      |                  | 2.81   | 1.70  | up   | up    |
| T05B4.3     | <i>phat-4</i>    | 1.81   | 1.70  | up   | up    |
| T24A11.3    | <i>toh-1</i>     | 1.80   | 1.63  | up   | up    |

| Description | Gene name       | 4μM    | 500μM  | 4μM  | 500μM |
|-------------|-----------------|--------|--------|------|-------|
| Y26D4A.10   |                 | 1.75   | 2.20   | up   | up    |
| Y38E10A.5   | <i>clec-4</i>   | 2.00   | 2.10   | up   | up    |
| Y40B10A.2   |                 | 1.63   | 1.84   | up   | up    |
| Y40B10A.6   |                 | 4.04   | 7.74   | up   | up    |
| Y51A2D.4    | <i>hmit-1.1</i> | 2.00   | 1.87   | up   | up    |
| Y54G2A.11   |                 | 2.32   | 2.16   | up   | up    |
| Y75B8A.28   |                 | 2.75   | 1.70   | up   | up    |
| ZC443.6     | <i>ugt-16</i>   | 3.28   | 1.91   | up   | up    |
| C04G2.5     |                 | -1.70  | -1.97  | down | down  |
| C14C6.3     |                 | -2.32  | -2.20  | down | down  |
| E01G4.6     |                 | -2.62  | -2.17  | down | down  |
| E03A3.4     | <i>his-70</i>   | -2.39  | -2.07  | down | down  |
| F01G10.9    |                 | -1.78  | -2.03  | down | down  |
| F08H9.5     | <i>clec-227</i> | -1.68  | -2.10  | down | down  |
| F09G2.3     |                 | -1.63  | -4.62  | down | down  |
| F10C2.7     |                 | -10.83 | -4.26  | down | down  |
| F15E11.12   |                 | -10.20 | -4.21  | down | down  |
| F15E11.15   |                 | -10.58 | -3.85  | down | down  |
| F22A3.6     | <i>ilys-5</i>   | -2.49  | -1.87  | down | down  |
| F22B5.4     |                 | -1.81  | -2.79  | down | down  |
| F28C6.5     |                 | -1.63  | -1.64  | down | down  |
| F44E5.4     |                 | -7.21  | -4.14  | down | down  |
| F44E5.5     |                 | -5.25  | -4.16  | down | down  |
| F55C10.4    |                 | -1.87  | -2.31  | down | down  |
| F56H6.5     | <i>gmd-2</i>    | -2.35  | -4.15  | down | down  |
| F57G8.7     |                 | -2.22  | -2.70  | down | down  |
| F58B3.2     | <i>lys-5</i>    | -2.07  | -1.83  | down | down  |
| K06H6.1     |                 | -2.67  | -2.22  | down | down  |
| K06H6.2     |                 | -4.67  | -2.28  | down | down  |
| T22B7.3     |                 | -2.39  | -1.80  | down | down  |
| W03F11.5    |                 | -1.68  | -1.71  | down | down  |
| W07A12.6    | <i>oac-54</i>   | -2.07  | -2.42  | down | down  |
| W07A12.7    | <i>rhy-1</i>    | -2.02  | -2.37  | down | down  |
| Y105C5B.7   |                 | -3.14  | -14.34 | down | down  |
| Y43D4A.5    |                 | -2.77  | -1.78  | down | down  |
| Y71G12B.18  |                 | -12.25 | -2.15  | down | down  |
| C03H5.1     | <i>clec-10</i>  | 1.16   | 2.82   |      | up    |
| C13D9.9     | <i>ugt-7</i>    | 1.49   | 2.40   |      | up    |
| C14C6.5     |                 | -1.23  | 3.12   |      | up    |
| C17H12.6    |                 | 1.28   | 1.90   |      | up    |
| C25H3.10    |                 | 1.15   | 2.99   |      | up    |
| C30G7.1     | <i>hil-1</i>    | 1.23   | 1.87   |      | up    |
| C31H5.6     |                 | 0.04   | 1.80   |      | up    |
| C32D5.6     |                 | 1.23   | 1.75   |      | up    |
| C34H4.1     |                 | 1.46   | 2.27   |      | up    |
| C45B2.5     | <i>gln-1</i>    | 1.32   | 1.68   |      | up    |
| C45E5.4     |                 | 1.32   | 1.65   |      | up    |
| C48B4.1     |                 | -1.20  | 1.66   |      | up    |
| E03H4.10    | <i>clec-17</i>  | 1.16   | 2.73   |      | up    |
| F01D5.1     |                 | -1.11  | 2.56   |      | up    |
| F01D5.3     |                 | -1.52  | 2.10   |      | up    |
| F01G10.3    | <i>ech-9</i>    | -0.04  | 3.26   |      | up    |
| F08F3.3     | <i>thr-1</i>    | 1.12   | 1.98   |      | up    |
| F09C8.1     |                 | -1.47  | 2.38   |      | up    |
| F10A3.2     | <i>fbxa-88</i>  | -1.11  | 1.66   |      | up    |
| F20G2.1     |                 | 1.29   | 2.01   |      | up    |
| F22A3.1     |                 | -0.22  | 1.67   |      | up    |
| F25A2.1     |                 | 1.58   | 4.91   |      | up    |
| F27C8.4     | <i>spp-18</i>   | -1.52  | 1.96   |      | up    |
| F27E5.1     |                 | 1.28   | 1.67   |      | up    |
| F35C5.7     | <i>clec-64</i>  | 0.43   | 3.37   |      | up    |
| F35C5.8     | <i>clec-65</i>  | 1.32   | 1.87   |      | up    |
| F36G9.14    | <i>fbxa-99</i>  | 1.00   | 1.71   |      | up    |
| F37B1.5     | <i>gst-16</i>   | 1.37   | 1.77   |      | up    |
| F39E9.1     |                 | 1.37   | 3.13   |      | up    |
| F44C8.1     | <i>cyp-33C4</i> | 0.28   | 2.28   |      | up    |
| F44G3.10    |                 | 1.58   | 3.49   |      | up    |
| F46E10.11   |                 | 1.19   | 1.62   |      | up    |
| F48G7.5     |                 | 1.11   | 3.02   |      | up    |
| F48G7.8     |                 | 0.16   | 3.07   |      | up    |
| F49F1.5     |                 | -1.28  | 2.87   |      | up    |
| F49H6.13    |                 | 0.12   | 1.88   |      | up    |

| Description | Gene name       | 4μM   | 500μM  | 4μM | 500μM |
|-------------|-----------------|-------|--------|-----|-------|
| F49H6.3     |                 | 1.19  | 2.10   |     | up    |
| F53A9.2     |                 | 1.21  | 2.02   |     | up    |
| F56A6.1     | <i>sago-2</i>   | -1.15 | 1.63   |     | up    |
| H20E11.1    |                 | 1.12  | 1.68   |     | up    |
| K02G10.7    | <i>agp-8</i>    | 0.00  | 2.01   |     | up    |
| K08E7.9     | <i>pgp-1</i>    | 0.00  | 2.15   |     | up    |
| M28.8       |                 | 1.28  | 1.83   |     | up    |
| R03G8.3     |                 | 1.39  | 1.79   |     | up    |
| R09D1.8     |                 | 0.44  | 2.53   |     | up    |
| R13A5.10    |                 | 0.13  | 1.61   |     | up    |
| T01C3.4     |                 | -1.28 | 2.60   |     | up    |
| T03F7.7     |                 | 1.42  | 1.64   |     | up    |
| T05E12.6    |                 | 1.23  | 1.96   |     | up    |
| T10B10.4    |                 | 1.23  | 1.63   |     | up    |
| T10H4.12    | <i>cpr-3</i>    | 1.28  | 2.17   |     | up    |
| T19C4.5     |                 | -0.08 | 1.77   |     | up    |
| T19C9.8     |                 | 1.53  | 2.54   |     | up    |
| T21C9.8     | <i>ttr-23</i>   | 1.47  | 2.17   |     | up    |
| W08E12.3    |                 | 1.42  | 1.68   |     | up    |
| Y105C5B.15  |                 | -1.37 | 1.89   |     | up    |
| Y34F4.4     |                 | 1.46  | 1.72   |     | up    |
| Y39D8C.1    | <i>abt-4</i>    | 0.00  | 1.63   |     | up    |
| Y39G8B.7    |                 | -1.46 | 2.25   |     | up    |
| Y46C8AR.1   | <i>clcc-76</i>  | 1.53  | 1.75   |     | up    |
| Y47H9C.1    |                 | -1.07 | 2.73   |     | up    |
| Y48A6B.7    |                 | -1.11 | 1.72   |     | up    |
| Y48E1B.8    |                 | -0.04 | 1.87   |     | up    |
| ZC443.5     | <i>ugt-18</i>   | 1.21  | 2.37   |     | up    |
| ZK6.10      | <i>dod-19</i>   | 1.15  | 2.44   |     | up    |
| B0286.3     |                 | -0.12 | -1.97  |     | down  |
| B0393.5     |                 | -1.53 | -1.67  |     | down  |
| C05C10.4    |                 | -1.28 | -2.14  |     | down  |
| C06B3.7     |                 | 1.21  | -2.21  |     | down  |
| C07E3.10    |                 | -1.57 | -1.69  |     | down  |
| C09D4.3     |                 | -1.24 | -1.67  |     | down  |
| C24G7.2     |                 | -0.04 | -1.70  |     | down  |
| C27D6.3     |                 | -0.21 | -2.07  |     | down  |
| C33F10.1    |                 | 0.12  | -1.80  |     | down  |
| C34D4.3     |                 | 1.37  | -3.61  |     | down  |
| C50B6.7     |                 | 1.23  | -2.53  |     | down  |
| C55F2.1     |                 | -0.43 | -2.17  |     | down  |
| F17C8.7     |                 | -0.30 | -1.91  |     | down  |
| F26B1.1     |                 | 1.35  | -2.42  |     | down  |
| F26C11.1    |                 | -1.28 | -10.56 |     | down  |
| F26H11.2    | <i>nurf-1</i>   | -1.17 | -1.79  |     | down  |
| F28D1.5     | <i>thn-2</i>    | -1.28 | -3.51  |     | down  |
| F32B6.4     |                 | -0.09 | -1.66  |     | down  |
| F36A4.2     |                 | 0.04  | -2.75  |     | down  |
| F37B1.8     | <i>gst-19</i>   | 1.39  | -2.30  |     | down  |
| F38B6.4     |                 | -1.07 | -2.03  |     | down  |
| F47C10.6    | <i>ugt-32</i>   | -1.46 | -2.11  |     | down  |
| F47D12.7    |                 | -0.04 | -3.49  |     | down  |
| F59C6.6     | <i>nlp-4</i>    | -1.52 | -2.23  |     | down  |
| H25K10.1    |                 | -1.57 | -1.74  |     | down  |
| K01A2.3     |                 | -1.11 | -2.62  |     | down  |
| K01A2.4     |                 | -1.37 | -11.35 |     | down  |
| K05F1.7     | <i>msh-63</i>   | 1.49  | -1.80  |     | down  |
| K07C6.4     | <i>cyp-35B1</i> | -1.55 | -6.77  |     | down  |
| K07E3.3     | <i>dao-3</i>    | -1.37 | -1.73  |     | down  |
| K09C6.8     |                 | -0.40 | -8.49  |     | down  |
| M02D8.4     |                 | -1.42 | -1.75  |     | down  |
| T09F5.1     |                 | -1.52 | -1.71  |     | down  |
| T09F5.9     | <i>clcc-47</i>  | 1.57  | -8.01  |     | down  |
| Y11D7A.5    |                 | -1.53 | -1.72  |     | down  |
| Y53F4B.32   | <i>gst-29</i>   | 0.04  | -1.97  |     | down  |
| Y59H11AM.3  |                 | 1.57  | -4.39  |     | down  |
| Y67A6A.2    |                 | -1.37 | -1.75  |     | down  |
| Y71G12B.17  |                 | 0.00  | -1.73  |     | down  |
| Y71H2AM.16  |                 | -1.52 | -2.15  |     | down  |
| ZK105.1     |                 | -0.16 | -1.71  |     | down  |
| ZK520.5     | <i>cyn-2</i>    | -0.08 | -4.81  |     | down  |
| ZK970.7     |                 | -0.08 | -1.67  |     | down  |
