# Supplementary material for: Genome-Wide Analysis Reveals Novel Genes Essential for Heme Homeostasis in Caenorhabditis elegans
Source: PubMed Central journal article supplement (PMC2912396; doi:10.1371/journal.pgen.1001044), 2010-07-29
Supplement: pgen.1001044.s004.pdf [file pgen.1001044.s004.pdf]

| Description | Gene name       | 4μM   | 4μM |
|-------------|-----------------|-------|-----|
| K01D12.14   | <i>cdr-5</i>    | 72.08 | up  |
| F58E6.7     |                 | 71.25 | up  |
| C16C4.4     | <i>math-14</i>  | 36.92 | up  |
| C15C8.3     |                 | 16.57 | up  |
| R02E12.6    | <i>hrg-1</i>    | 16.04 | up  |
| F58E6.8     |                 | 12.73 | up  |
| C29E4.7     | <i>gsto-1</i>   | 12.15 | up  |
| F18A12.4    |                 | 10.87 | up  |
| F36H1.5     | <i>hrg-4</i>    | 9.19  | up  |
| F08F8.5     | <i>numr-1</i>   | 7.66  | up  |
| W07B8.1     |                 | 5.86  | up  |
| F59D8.2     | <i>vit-4</i>    | 5.80  | up  |
| F15B9.6     |                 | 4.78  | up  |
| Y62H9A.4    |                 | 4.66  | up  |
| C31C9.1     | <i>tag-10</i>   | 4.59  | up  |
| Y37D8A.19   |                 | 4.45  | up  |
| K07H8.6     | <i>vit-6</i>    | 4.45  | up  |
| F59D8.1     | <i>vit-3</i>    | 4.35  | up  |
| C10G8.4     |                 | 4.20  | up  |
| Y40B10A.6   |                 | 4.04  | up  |
| ZC373.2     |                 | 4.01  | up  |
| C44B7.5     |                 | 3.78  | up  |
| F17E9.4     |                 | 3.78  | up  |
| ZK813.1     |                 | 3.74  | up  |
| C01G6.3     |                 | 3.62  | up  |
| Y54G11A.7   |                 | 3.62  | up  |
| F07C4.2     | <i>clcc-45</i>  | 3.51  | up  |
| F14F4.3     | <i>mrp-5</i>    | 3.48  | up  |
| F49F1.6     |                 | 3.32  | up  |
| ZC443.6     | <i>ugt-16</i>   | 3.28  | up  |
| D1054.10    |                 | 3.28  | up  |
| C44B12.1    |                 | 3.14  | up  |
| F32H5.1     |                 | 3.14  | up  |
| K02B9.1     | <i>meg-1</i>    | 3.07  | up  |
| C24F3.3     | <i>nas-12</i>   | 3.05  | up  |
| F57C2.4     |                 | 2.94  | up  |
| C50H11.15   | <i>cyp-33C9</i> | 2.94  | up  |
| T04G9.7     |                 | 2.94  | up  |
| T21C9.13    |                 | 2.94  | up  |
| K08B4.3     | <i>ugt-19</i>   | 2.93  | up  |
| F07C4.9     | <i>clcc-46</i>  | 2.93  | up  |
| C33A12.6    | <i>ugt-21</i>   | 2.87  | up  |
| K10B2.2     |                 | 2.84  | up  |
| Y62H9A.6    |                 | 2.83  | up  |
| R193.2      |                 | 2.82  | up  |
| R186.1      |                 | 2.81  | up  |
| C04H5.7     |                 | 2.80  | up  |
| Y75B8A.28   |                 | 2.75  | up  |
| F58G6.3     |                 | 2.75  | up  |
| C42D8.2     |                 | 2.62  | up  |
| ZK742.3     |                 | 2.55  | up  |
| C32H11.10   | <i>dod-21</i>   | 2.42  | up  |
| Y54G2A.11   |                 | 2.32  | up  |
| F42G2.2     |                 | 2.30  | up  |
| M02H5.4     | <i>nhr-202</i>  | 2.30  | up  |

| Description | Gene name       | 4μM  | 4μM |
|-------------|-----------------|------|-----|
| ZK1193.1    | <i>col-19</i>   | 2.28 | up  |
| F54E2.1     |                 | 2.22 | up  |
| F59D6.3     |                 | 2.22 | up  |
| F58E6.4     |                 | 2.20 | up  |
| M02F4.7     | <i>clec-265</i> | 2.16 | up  |
| C25A1.8     | <i>clec-87</i>  | 2.15 | up  |
| F35B3.4     |                 | 2.14 | up  |
| F47C10.2    | <i>btb-21</i>   | 2.07 | up  |
| K01D12.9    |                 | 2.07 | up  |
| Y38E10A.5   | <i>clec-4</i>   | 2.00 | up  |
| Y51A2D.4    | <i>hmit-1.1</i> | 2.00 | up  |
| F32H5.3     |                 | 2.00 | up  |
| EEED8.3     |                 | 2.00 | up  |
| F52E1.1     | <i>pos-1</i>    | 2.00 | up  |
| T02G5.11    |                 | 1.96 | up  |
| F35C5.9     | <i>clec-66</i>  | 1.93 | up  |
| K11H12.4    |                 | 1.93 | up  |
| C42D4.3     |                 | 1.93 | up  |
| F36A2.3     |                 | 1.93 | up  |
| F11G11.3    | <i>gst-6</i>    | 1.88 | up  |
| T18H9.1     | <i>grd-6</i>    | 1.87 | up  |
| R06C7.4     | <i>cpg-3</i>    | 1.87 | up  |
| T11F9.3     | <i>nas-20</i>   | 1.87 | up  |
| C08B6.1     |                 | 1.84 | up  |
| C34H4.2     |                 | 1.81 | up  |
| T05B4.3     | <i>phat-4</i>   | 1.81 | up  |
| T05A1.2     | <i>col-122</i>  | 1.81 | up  |
| T24A11.3    | <i>toh-1</i>    | 1.80 | up  |
| F44G3.2     |                 | 1.80 | up  |
| F48E3.4     |                 | 1.80 | up  |
| T21F4.1     |                 | 1.80 | up  |
| T28C12.6    |                 | 1.80 | up  |
| H23N18.1    | <i>ugt-13</i>   | 1.77 | up  |
| F02D8.4     |                 | 1.76 | up  |
| Y26D4A.10   |                 | 1.75 | up  |
| C05E7.2     |                 | 1.74 | up  |
| Y73F8A.9    | <i>pqn-91</i>   | 1.74 | up  |
| C04F6.1     |                 | 1.74 | up  |
| F26F12.1    |                 | 1.72 | up  |
| W03G11.1    | <i>col-181</i>  | 1.71 | up  |
| F07F6.5     | <i>dct-5</i>    | 1.68 | up  |
| K10D11.1    | <i>dod-17</i>   | 1.68 | up  |
| W02G9.4     |                 | 1.68 | up  |
| F38A3.1     | <i>col-81</i>   | 1.68 | up  |
| C54D10.1    | <i>cdr-2</i>    | 1.66 | up  |
| C54F6.14    | <i>ftn-1</i>    | 1.66 | up  |
| K09F5.2     | <i>vit-1</i>    | 1.65 | up  |
| R10D12.9    |                 | 1.64 | up  |
| F21H7.1     | <i>gst-22</i>   | 1.63 | up  |
| K02E2.4     | <i>ins-35</i>   | 1.63 | up  |
| Y40B10A.2   |                 | 1.63 | up  |
| C33H5.13    |                 | 1.62 | up  |
| C08F11.11   |                 | 1.62 | up  |
| F41F3.4     | <i>col-139</i>  | 1.61 | up  |
