# Supplementary material for: Genome-Wide Analysis Reveals Novel Genes Essential for Heme Homeostasis in Caenorhabditis elegans
Source: PubMed Central journal article supplement (PMC2912396; doi:10.1371/journal.pgen.1001044), 2010-07-29
Supplement: pgen.1001044.s008.pdf [file pgen.1001044.s008.pdf]

| Term                                        | Annotated | Significant | Expected | Rank in classic Fisher | classic Fisher | elimFisher |
|---------------------------------------------|-----------|-------------|----------|------------------------|----------------|------------|
| lipid transport                             | 6         | 6           | 2.3      | 1                      | 0.0025         | 0.0025     |
| proteolysis                                 | 15        | 11          | 5.74     | 2                      | 0.0037         | 0.0037     |
| embryonic development ending in birth or... | 17        | 12          | 6.5      | 3                      | 0.0038         | 0.0038     |
| embryonic development                       | 18        | 12          | 6.89     | 4                      | 0.008          | 1          |
| developmental process                       | 37        | 20          | 14.16    | 5                      | 0.0145         | 0.2978     |
| multicellular organismal development        | 35        | 18          | 13.39    | 6                      | 0.044          | 0.575      |
| protein metabolic process                   | 19        | 11          | 7.27     | 7                      | 0.049          | 1          |
| cellular protein metabolic process          | 19        | 11          | 7.27     | 8                      | 0.049          | 1          |
| cellular biopolymer metabolic process       | 22        | 12          | 8.42     | 9                      | 0.0676         | 0.9457     |
| cellular macromolecule metabolic process    | 22        | 12          | 8.42     | 10                     | 0.0676         | 0.9457     |
| multicellular organismal process            | 39        | 19          | 14.92    | 11                     | 0.074          | 0.6319     |
| macromolecule metabolic process             | 23        | 12          | 8.8      | 12                     | 0.0986         | 0.965      |
| biopolymer metabolic process                | 23        | 12          | 8.8      | 13                     | 0.0986         | 0.965      |
| regulation of growth rate                   | 19        | 10          | 7.27     | 14                     | 0.1252         | 0.1252     |
| positive regulation of growth rate          | 19        | 10          | 7.27     | 15                     | 0.1252         | 0.1252     |
| biological regulation                       | 24        | 12          | 9.18     | 16                     | 0.1373         | 0.1373     |
| regulation of growth                        | 20        | 10          | 7.65     | 17                     | 0.1744         | 0.1744     |
| positive regulation of growth               | 20        | 10          | 7.65     | 18                     | 0.1744         | 0.1744     |
| positive regulation of biological proces... | 20        | 10          | 7.65     | 19                     | 0.1744         | 0.1744     |
| growth                                      | 23        | 11          | 8.8      | 20                     | 0.2065         | 0.2065     |
| regulation of biological process            | 23        | 11          | 8.8      | 21                     | 0.2065         | 0.2065     |
| anatomical structure development            | 7         | 4           | 2.68     | 22                     | 0.251          | 0.251      |
| anatomical structure morphogenesis          | 5         | 3           | 1.91     | 23                     | 0.2843         | 0.2843     |
| transport                                   | 17        | 8           | 6.5      | 24                     | 0.292          | 0.9476     |
| localization                                | 17        | 8           | 6.5      | 25                     | 0.292          | 0.9476     |
| establishment of localization               | 17        | 8           | 6.5      | 26                     | 0.292          | 0.9476     |
| body morphogenesis                          | 3         | 2           | 1.15     | 27                     | 0.3257         | 0.3257     |
| transition metal ion transport              | 1         | 1           | 0.38     | 28                     | 0.3826         | 0.3826     |
| cell fate specification                     | 1         | 1           | 0.38     | 29                     | 0.3826         | 0.3826     |
| morphogenesis of an epithelium              | 1         | 1           | 0.38     | 30                     | 0.3826         | 0.3826     |
| iron ion transport                          | 1         | 1           | 0.38     | 31                     | 0.3826         | 0.3826     |
| cellular ion homeostasis                    | 1         | 1           | 0.38     | 32                     | 0.3826         | 0.3826     |
| cellular iron ion homeostasis               | 1         | 1           | 0.38     | 33                     | 0.3826         | 0.3826     |
| pattern specification process               | 1         | 1           | 0.38     | 34                     | 0.3826         | 0.3826     |
| protein-based cuticle development           | 1         | 1           | 0.38     | 35                     | 0.3826         | 0.3826     |
| embryonic pattern specification             | 1         | 1           | 0.38     | 36                     | 0.3826         | 0.3826     |
| di-, tri-valent inorganic cation transpo... | 1         | 1           | 0.38     | 37                     | 0.3826         | 0.3826     |
| cellular homeostasis                        | 1         | 1           | 0.38     | 38                     | 0.3826         | 0.3826     |
| cellular cation homeostasis                 | 1         | 1           | 0.38     | 39                     | 0.3826         | 0.3826     |
| cellular di-, tri-valent inorganic catio... | 1         | 1           | 0.38     | 40                     | 0.3826         | 0.3826     |
| cell differentiation                        | 1         | 1           | 0.38     | 41                     | 0.3826         | 0.3826     |
| collagen and cuticulin-based cuticle dev... | 1         | 1           | 0.38     | 42                     | 0.3826         | 0.3826     |
| regulation of locomotion                    | 1         | 1           | 0.38     | 43                     | 0.3826         | 0.3826     |
| positive regulation of locomotion           | 1         | 1           | 0.38     | 44                     | 0.3826         | 0.3826     |
| cuticle development                         | 1         | 1           | 0.38     | 45                     | 0.3826         | 0.3826     |
| homeostatic process                         | 1         | 1           | 0.38     | 46                     | 0.3826         | 0.3826     |
| cell fate commitment                        | 1         | 1           | 0.38     | 47                     | 0.3826         | 0.3826     |
| cellular developmental process              | 1         | 1           | 0.38     | 48                     | 0.3826         | 0.3826     |
| chemical homeostasis                        | 1         | 1           | 0.38     | 49                     | 0.3826         | 0.3826     |
| ion homeostasis                             | 1         | 1           | 0.38     | 50                     | 0.3826         | 0.3826     |
| di-, tri-valent inorganic cation homeost... | 1         | 1           | 0.38     | 51                     | 0.3826         | 0.3826     |
| iron ion homeostasis                        | 1         | 1           | 0.38     | 52                     | 0.3826         | 0.3826     |
| cation homeostasis                          | 1         | 1           | 0.38     | 53                     | 0.3826         | 0.3826     |
| cellular chemical homeostasis               | 1         | 1           | 0.38     | 54                     | 0.3826         | 0.3826     |
| transmembrane transport                     | 1         | 1           | 0.38     | 55                     | 0.3826         | 0.3826     |
| regulation of biological quality            | 1         | 1           | 0.38     | 56                     | 0.3826         | 0.3826     |
| aging                                       | 11        | 5           | 4.21     | 57                     | 0.4171         | 0.4171     |
| determination of adult life span            | 11        | 5           | 4.21     | 58                     | 0.4171         | 0.4171     |
| multicellular organismal aging              | 11        | 5           | 4.21     | 59                     | 0.4171         | 0.4171     |
| locomotion                                  | 11        | 5           | 4.21     | 60                     | 0.4171         | 0.4171     |
| reproductive developmental process          | 2         | 1           | 0.77     | 61                     | 0.6209         | 0.6209     |
| cation transport                            | 2         | 1           | 0.77     | 62                     | 0.6209         | 0.6209     |
| sex differentiation                         | 2         | 1           | 0.77     | 63                     | 0.6209         | 0.6209     |
| metal ion transport                         | 2         | 1           | 0.77     | 64                     | 0.6209         | 0.6209     |
| hermaphrodite genitalia development         | 2         | 1           | 0.77     | 65                     | 0.6209         | 0.6209     |
| organ development                           | 2         | 1           | 0.77     | 66                     | 0.6209         | 0.6209     |
| system development                          | 2         | 1           | 0.77     | 67                     | 0.6209         | 0.6209     |
| genitalia development                       | 2         | 1           | 0.77     | 68                     | 0.6209         | 0.6209     |
| nematode larval development                 | 5         | 2           | 1.91     | 69                     | 0.6366         | 0.6366     |
| larval development                          | 5         | 2           | 1.91     | 70                     | 0.6366         | 0.6366     |
| post-embryonic development                  | 5         | 2           | 1.91     | 71                     | 0.6366         | 0.6366     |
| behavior                                    | 6         | 2           | 2.3      | 72                     | 0.7455         | 0.7455     |

| Term                                        | Annotated | Significant | Expected | Rank in classic Fisher | classic Fisher | elimFisher |
|---------------------------------------------|-----------|-------------|----------|------------------------|----------------|------------|
| oviposition                                 | 6         | 2           | 2.3      | 73                     | 0.7455         | 0.7455     |
| reproductive behavior                       | 6         | 2           | 2.3      | 74                     | 0.7455         | 0.7455     |
| multicellular organism reproduction         | 6         | 2           | 2.3      | 75                     | 0.7455         | 0.7455     |
| reproductive behavior in a multicellular... | 6         | 2           | 2.3      | 76                     | 0.7455         | 0.7455     |
| reproductive process in a multicellular ... | 6         | 2           | 2.3      | 77                     | 0.7455         | 0.7455     |
| transcription                               | 3         | 1           | 1.15     | 78                     | 0.7685         | 0.7685     |
| transcription, DNA-dependent                | 3         | 1           | 1.15     | 79                     | 0.7685         | 0.7685     |
| regulation of transcription, DNA-depende... | 3         | 1           | 1.15     | 80                     | 0.7685         | 0.7685     |
| ion transport                               | 3         | 1           | 1.15     | 81                     | 0.7685         | 0.7685     |
| regulation of biosynthetic process          | 3         | 1           | 1.15     | 82                     | 0.7685         | 0.7685     |
| regulation of gene expression               | 3         | 1           | 1.15     | 83                     | 0.7685         | 0.7685     |
| regulation of macromolecule biosynthetic... | 3         | 1           | 1.15     | 84                     | 0.7685         | 0.7685     |
| RNA metabolic process                       | 3         | 1           | 1.15     | 85                     | 0.7685         | 0.7685     |
| regulation of nucleobase, nucleoside, nu... | 3         | 1           | 1.15     | 86                     | 0.7685         | 0.7685     |
| regulation of metabolic process             | 3         | 1           | 1.15     | 87                     | 0.7685         | 0.7685     |
| regulation of cellular metabolic process    | 3         | 1           | 1.15     | 88                     | 0.7685         | 0.7685     |
| regulation of cellular biosynthetic proc... | 3         | 1           | 1.15     | 89                     | 0.7685         | 0.7685     |
| RNA biosynthetic process                    | 3         | 1           | 1.15     | 90                     | 0.7685         | 0.7685     |
| regulation of transcription                 | 3         | 1           | 1.15     | 91                     | 0.7685         | 0.7685     |
| regulation of RNA metabolic process         | 3         | 1           | 1.15     | 92                     | 0.7685         | 0.7685     |
| regulation of macromolecule metabolic pr... | 3         | 1           | 1.15     | 93                     | 0.7685         | 0.7685     |
| metabolic process                           | 56        | 20          | 21.43    | 94                     | 0.77           | 0.9863     |
| cellular metabolic process                  | 35        | 12          | 13.39    | 95                     | 0.7839         | 0.9999     |
| reproduction                                | 13        | 4           | 4.97     | 96                     | 0.8125         | 0.8125     |
| reproductive process                        | 7         | 2           | 2.68     | 97                     | 0.8258         | 0.8258     |
| gene expression                             | 4         | 1           | 1.53     | 98                     | 0.8595         | 0.8595     |
| cellular biopolymer biosynthetic process    | 4         | 1           | 1.53     | 99                     | 0.8595         | 0.8595     |
| biopolymer biosynthetic process             | 4         | 1           | 1.53     | 100                    | 0.8595         | 0.8595     |
| cellular process                            | 46        | 15          | 17.6     | 101                    | 0.888          | 0.9994     |
| macromolecule biosynthetic process          | 5         | 1           | 1.91     | 102                    | 0.9152         | 0.9152     |
| cellular macromolecule biosynthetic proc... | 5         | 1           | 1.91     | 103                    | 0.9152         | 0.9152     |
| regulation of cellular process              | 5         | 1           | 1.91     | 104                    | 0.9152         | 0.9152     |
| response to stimulus                        | 10        | 2           | 3.83     | 105                    | 0.9498         | 0.9498     |
| primary metabolic process                   | 41        | 12          | 15.69    | 106                    | 0.9544         | 1          |
| nucleobase, nucleoside, nucleotide and n... | 7         | 1           | 2.68     | 107                    | 0.9696         | 0.9696     |
| biosynthetic process                        | 11        | 1           | 4.21     | 108                    | 0.9964         | 0.9964     |
| cellular biosynthetic process               | 11        | 1           | 4.21     | 109                    | 0.9964         | 0.9964     |
| biological process                          | 115       | 44          | 44       | 110                    | 1              | 1          |
| peptidoglycan metabolic process             | 2         | 0           | 0.77     | 111                    | 1              | 1          |
| M phase                                     | 1         | 0           | 0.38     | 112                    | 1              | 1          |
| gastrulation with mouth forming first       | 1         | 0           | 0.38     | 113                    | 1              | 1          |
| carbohydrate metabolic process              | 6         | 0           | 2.3      | 114                    | 1              | 1          |
| polysaccharide metabolic process            | 1         | 0           | 0.38     | 115                    | 1              | 1          |
| monosaccharide metabolic process            | 1         | 0           | 0.38     | 116                    | 1              | 1          |
| fucose metabolic process                    | 1         | 0           | 0.38     | 117                    | 1              | 1          |
| L-fucose biosynthetic process               | 1         | 0           | 0.38     | 118                    | 1              | 1          |
| mannose metabolic process                   | 1         | 0           | 0.38     | 119                    | 1              | 1          |
| chitin metabolic process                    | 1         | 0           | 0.38     | 120                    | 1              | 1          |
| chitin catabolic process                    | 1         | 0           | 0.38     | 121                    | 1              | 1          |
| amino sugar metabolic process               | 1         | 0           | 0.38     | 122                    | 1              | 1          |
| glucosamine metabolic process               | 1         | 0           | 0.38     | 123                    | 1              | 1          |
| glucosamine catabolic process               | 1         | 0           | 0.38     | 124                    | 1              | 1          |
| N-acetylglucosamine metabolic process       | 1         | 0           | 0.38     | 125                    | 1              | 1          |
| N-acetylglucosamine catabolic process       | 1         | 0           | 0.38     | 126                    | 1              | 1          |
| cellular alcohol metabolic process          | 1         | 0           | 0.38     | 127                    | 1              | 1          |
| organic acid metabolic process              | 6         | 0           | 2.3      | 128                    | 1              | 1          |
| purine base metabolic process               | 1         | 0           | 0.38     | 129                    | 1              | 1          |
| purine nucleotide metabolic process         | 3         | 0           | 1.15     | 130                    | 1              | 1          |
| purine nucleotide biosynthetic process      | 3         | 0           | 1.15     | 131                    | 1              | 1          |
| IMP biosynthetic process                    | 3         | 0           | 1.15     | 132                    | 1              | 1          |
| 'de novo' IMP biosynthetic process          | 2         | 0           | 0.77     | 133                    | 1              | 1          |
| DNA packaging                               | 2         | 0           | 0.77     | 134                    | 1              | 1          |
| establishment or maintenance of chromati... | 2         | 0           | 0.77     | 135                    | 1              | 1          |
| chromatin assembly or disassembly           | 2         | 0           | 0.77     | 136                    | 1              | 1          |
| nucleosome assembly                         | 2         | 0           | 0.77     | 137                    | 1              | 1          |
| translation                                 | 1         | 0           | 0.38     | 138                    | 1              | 1          |
| protein folding                             | 1         | 0           | 0.38     | 139                    | 1              | 1          |
| protein modification process                | 3         | 0           | 1.15     | 140                    | 1              | 1          |
| protein amino acid phosphorylation          | 1         | 0           | 0.38     | 141                    | 1              | 1          |
| protein amino acid glycosylation            | 1         | 0           | 0.38     | 142                    | 1              | 1          |
| cellular amino acid and derivative metab... | 2         | 0           | 0.77     | 143                    | 1              | 1          |
| amino acid metabolic process                | 2         | 0           | 0.77     | 144                    | 1              | 1          |
| asparagine metabolic process                | 1         | 0           | 0.38     | 145                    | 1              | 1          |
| asparagine biosynthetic process             | 1         | 0           | 0.38     | 146                    | 1              | 1          |
| glutamine metabolic process                 | 1         | 0           | 0.38     | 147                    | 1              | 1          |
| glutamine biosynthetic process              | 1         | 0           | 0.38     | 148                    | 1              | 1          |
| lipid metabolic process                     | 9         | 0           | 3.44     | 149                    | 1              | 1          |

| Term                                        | Annotated | Significant | Expected | Rank in classic Fisher | classic Fisher | elimFisher |
|---------------------------------------------|-----------|-------------|----------|------------------------|----------------|------------|
| fatty acid metabolic process                | 3         | 0           | 1.15     | 150                    | 1              | 1          |
| fatty acid biosynthetic process             | 1         | 0           | 0.38     | 151                    | 1              | 1          |
| acyl-CoA metabolic process                  | 1         | 0           | 0.38     | 152                    | 1              | 1          |
| membrane lipid metabolic process            | 2         | 0           | 0.77     | 153                    | 1              | 1          |
| phospholipid metabolic process              | 2         | 0           | 0.77     | 154                    | 1              | 1          |
| sphingolipid metabolic process              | 2         | 0           | 0.77     | 155                    | 1              | 1          |
| sphingomyelin metabolic process             | 2         | 0           | 0.77     | 156                    | 1              | 1          |
| sphingomyelin catabolic process             | 2         | 0           | 0.77     | 157                    | 1              | 1          |
| cellular aromatic compound metabolic pro... | 2         | 0           | 0.77     | 158                    | 1              | 1          |
| coenzyme metabolic process                  | 2         | 0           | 0.77     | 159                    | 1              | 1          |
| group transfer coenzyme metabolic proces... | 1         | 0           | 0.38     | 160                    | 1              | 1          |
| nucleoside phosphate metabolic process      | 3         | 0           | 1.15     | 161                    | 1              | 1          |
| folic acid and derivative metabolic proc... | 1         | 0           | 0.38     | 162                    | 1              | 1          |
| phosphorus metabolic process                | 2         | 0           | 0.77     | 163                    | 1              | 1          |
| phosphate metabolic process                 | 2         | 0           | 0.77     | 164                    | 1              | 1          |
| nitrogen compound metabolic process         | 2         | 0           | 0.77     | 165                    | 1              | 1          |
| sodium ion transport                        | 1         | 0           | 0.38     | 166                    | 1              | 1          |
| phosphate transport                         | 1         | 0           | 0.38     | 167                    | 1              | 1          |
| anion transport                             | 1         | 0           | 0.38     | 168                    | 1              | 1          |
| response to stress                          | 4         | 0           | 1.53     | 169                    | 1              | 1          |
| defense response                            | 2         | 0           | 0.77     | 170                    | 1              | 1          |
| ER-nuclear signaling pathway                | 2         | 0           | 0.77     | 171                    | 1              | 1          |
| response to unfolded protein                | 2         | 0           | 0.77     | 172                    | 1              | 1          |
| organelle organization                      | 2         | 0           | 0.77     | 173                    | 1              | 1          |
| cell wall organization                      | 2         | 0           | 0.77     | 174                    | 1              | 1          |
| cell cycle                                  | 1         | 0           | 0.38     | 175                    | 1              | 1          |
| chromosome segregation                      | 1         | 0           | 0.38     | 176                    | 1              | 1          |
| meiosis                                     | 1         | 0           | 0.38     | 177                    | 1              | 1          |
| cell communication                          | 3         | 0           | 1.15     | 178                    | 1              | 1          |
| cell adhesion                               | 1         | 0           | 0.38     | 179                    | 1              | 1          |
| cell-matrix adhesion                        | 1         | 0           | 0.38     | 180                    | 1              | 1          |
| signal transduction                         | 2         | 0           | 0.77     | 181                    | 1              | 1          |
| intracellular signaling cascade             | 2         | 0           | 0.77     | 182                    | 1              | 1          |
| gastrulation                                | 1         | 0           | 0.38     | 183                    | 1              | 1          |
| lipid biosynthetic process                  | 1         | 0           | 0.38     | 184                    | 1              | 1          |
| amino acid biosynthetic process             | 2         | 0           | 0.77     | 185                    | 1              | 1          |
| catabolic process                           | 5         | 0           | 1.91     | 186                    | 1              | 1          |
| glutamine family amino acid metabolic pr... | 1         | 0           | 0.38     | 187                    | 1              | 1          |
| aspartate family amino acid metabolic pr... | 1         | 0           | 0.38     | 188                    | 1              | 1          |
| aspartate family amino acid biosynthetic... | 1         | 0           | 0.38     | 189                    | 1              | 1          |
| glutamine family amino acid biosynthetic... | 1         | 0           | 0.38     | 190                    | 1              | 1          |
| glycoprotein metabolic process              | 1         | 0           | 0.38     | 191                    | 1              | 1          |
| glycoprotein biosynthetic process           | 1         | 0           | 0.38     | 192                    | 1              | 1          |
| coenzyme biosynthetic process               | 1         | 0           | 0.38     | 193                    | 1              | 1          |
| nucleobase metabolic process                | 1         | 0           | 0.38     | 194                    | 1              | 1          |
| purine base biosynthetic process            | 1         | 0           | 0.38     | 195                    | 1              | 1          |
| nucleotide metabolic process                | 3         | 0           | 1.15     | 196                    | 1              | 1          |
| nucleoside monophosphate metabolic proce... | 3         | 0           | 1.15     | 197                    | 1              | 1          |
| nucleoside monophosphate biosynthetic pr... | 3         | 0           | 1.15     | 198                    | 1              | 1          |
| purine nucleoside monophosphate metaboli... | 3         | 0           | 1.15     | 199                    | 1              | 1          |
| purine nucleoside monophosphate biosynth... | 3         | 0           | 1.15     | 200                    | 1              | 1          |
| purine ribonucleotide metabolic process     | 3         | 0           | 1.15     | 201                    | 1              | 1          |
| purine ribonucleotide biosynthetic proce... | 3         | 0           | 1.15     | 202                    | 1              | 1          |
| ribonucleoside monophosphate biosyntheti... | 3         | 0           | 1.15     | 203                    | 1              | 1          |
| ribonucleoside monophosphate metabolic p... | 3         | 0           | 1.15     | 204                    | 1              | 1          |
| nucleotide biosynthetic process             | 3         | 0           | 1.15     | 205                    | 1              | 1          |
| purine ribonucleoside monophosphate meta... | 3         | 0           | 1.15     | 206                    | 1              | 1          |
| purine ribonucleoside monophosphate bios... | 3         | 0           | 1.15     | 207                    | 1              | 1          |
| nucleotide-sugar metabolic process          | 1         | 0           | 0.38     | 208                    | 1              | 1          |
| nucleotide-sugar biosynthetic process       | 1         | 0           | 0.38     | 209                    | 1              | 1          |
| peptidoglycan catabolic process             | 2         | 0           | 0.77     | 210                    | 1              | 1          |
| ribonucleotide metabolic process            | 3         | 0           | 1.15     | 211                    | 1              | 1          |
| ribonucleotide biosynthetic process         | 3         | 0           | 1.15     | 212                    | 1              | 1          |
| cellular amine metabolic process            | 2         | 0           | 0.77     | 213                    | 1              | 1          |
| amine biosynthetic process                  | 2         | 0           | 0.77     | 214                    | 1              | 1          |
| phospholipid catabolic process              | 2         | 0           | 0.77     | 215                    | 1              | 1          |
| folic acid and derivative biosynthetic p... | 1         | 0           | 0.38     | 216                    | 1              | 1          |
| response to biotic stimulus                 | 2         | 0           | 0.77     | 217                    | 1              | 1          |
| gas transport                               | 1         | 0           | 0.38     | 218                    | 1              | 1          |
| oxygen transport                            | 1         | 0           | 0.38     | 219                    | 1              | 1          |
| monovalent inorganic cation transport       | 1         | 0           | 0.38     | 220                    | 1              | 1          |
| inorganic anion transport                   | 1         | 0           | 0.38     | 221                    | 1              | 1          |
| lipid catabolic process                     | 2         | 0           | 0.77     | 222                    | 1              | 1          |
| cellular component organization             | 4         | 0           | 1.53     | 223                    | 1              | 1          |
| carbohydrate biosynthetic process           | 1         | 0           | 0.38     | 224                    | 1              | 1          |
| carbohydrate catabolic process              | 3         | 0           | 1.15     | 225                    | 1              | 1          |

| Term                                        | Annotated | Significant | Expected | Rank in classic Fisher | classic Fisher | elimFisher |
|---------------------------------------------|-----------|-------------|----------|------------------------|----------------|------------|
| organic acid biosynthetic process           | 1         | 0           | 0.38     | 226                    | 1              | 1          |
| phosphorylation                             | 1         | 0           | 0.38     | 227                    | 1              | 1          |
| protein processing                          | 1         | 0           | 0.38     | 228                    | 1              | 1          |
| intein-mediated protein splicing            | 1         | 0           | 0.38     | 229                    | 1              | 1          |
| cell wall catabolic process                 | 2         | 0           | 0.77     | 230                    | 1              | 1          |
| molting cycle, protein-based cuticle        | 1         | 0           | 0.38     | 231                    | 1              | 1          |
| molting cycle, collagen and cuticulin-ba... | 1         | 0           | 0.38     | 232                    | 1              | 1          |
| hexose metabolic process                    | 1         | 0           | 0.38     | 233                    | 1              | 1          |
| hexose biosynthetic process                 | 1         | 0           | 0.38     | 234                    | 1              | 1          |
| GDP-mannose metabolic process               | 1         | 0           | 0.38     | 235                    | 1              | 1          |
| carboxylic acid metabolic process           | 6         | 0           | 2.3      | 236                    | 1              | 1          |
| cell cycle process                          | 1         | 0           | 0.38     | 237                    | 1              | 1          |
| cell cycle phase                            | 1         | 0           | 0.38     | 238                    | 1              | 1          |
| cellular component assembly                 | 2         | 0           | 0.77     | 239                    | 1              | 1          |
| biological adhesion                         | 1         | 0           | 0.38     | 240                    | 1              | 1          |
| sphingolipid catabolic process              | 2         | 0           | 0.77     | 241                    | 1              | 1          |
| protein splicing                            | 1         | 0           | 0.38     | 242                    | 1              | 1          |
| endoplasmic reticulum unfolded protein r... | 2         | 0           | 0.77     | 243                    | 1              | 1          |
| chromatin assembly                          | 2         | 0           | 0.77     | 244                    | 1              | 1          |
| cell-substrate adhesion                     | 1         | 0           | 0.38     | 245                    | 1              | 1          |
| monocarboxylic acid metabolic process       | 4         | 0           | 1.53     | 246                    | 1              | 1          |
| cellular response to stress                 | 2         | 0           | 0.77     | 247                    | 1              | 1          |
| nucleobase, nucleoside and nucleotide bi... | 1         | 0           | 0.38     | 248                    | 1              | 1          |
| cellular response to unfolded protein       | 2         | 0           | 0.77     | 249                    | 1              | 1          |
| cellular macromolecular complex subunit ... | 2         | 0           | 0.77     | 250                    | 1              | 1          |
| cellular macromolecular complex assembly    | 2         | 0           | 0.77     | 251                    | 1              | 1          |
| cellular carbohydrate biosynthetic proce... | 1         | 0           | 0.38     | 252                    | 1              | 1          |
| cellular nitrogen compound metabolic pro... | 2         | 0           | 0.77     | 253                    | 1              | 1          |
| nucleobase, nucleoside, nucleotide and n... | 1         | 0           | 0.38     | 254                    | 1              | 1          |
| nucleosome organization                     | 2         | 0           | 0.77     | 255                    | 1              | 1          |
| response to endoplasmic reticulum stress    | 2         | 0           | 0.77     | 256                    | 1              | 1          |
| multicellular organism growth               | 1         | 0           | 0.38     | 257                    | 1              | 1          |
| regulation of multicellular organism gro... | 1         | 0           | 0.38     | 258                    | 1              | 1          |
| positive regulation of multicellular org... | 1         | 0           | 0.38     | 259                    | 1              | 1          |
| response to chemical stimulus               | 2         | 0           | 0.77     | 260                    | 1              | 1          |
| molting cycle                               | 1         | 0           | 0.38     | 261                    | 1              | 1          |
| GDP-L-fucose biosynthetic process           | 1         | 0           | 0.38     | 262                    | 1              | 1          |
| fucose biosynthetic process                 | 1         | 0           | 0.38     | 263                    | 1              | 1          |
| L-fucose metabolic process                  | 1         | 0           | 0.38     | 264                    | 1              | 1          |
| pigment metabolic process                   | 1         | 0           | 0.38     | 265                    | 1              | 1          |
| biopolymer modification                     | 3         | 0           | 1.15     | 266                    | 1              | 1          |
| biopolymer glycosylation                    | 1         | 0           | 0.38     | 267                    | 1              | 1          |
| post-translational protein modification     | 2         | 0           | 0.77     | 268                    | 1              | 1          |
| macromolecular complex subunit organizat... | 2         | 0           | 0.77     | 269                    | 1              | 1          |
| cell wall metabolic process                 | 2         | 0           | 0.77     | 270                    | 1              | 1          |
| cellular lipid catabolic process            | 2         | 0           | 0.77     | 271                    | 1              | 1          |
| cellular catabolic process                  | 2         | 0           | 0.77     | 272                    | 1              | 1          |
| cellular lipid metabolic process            | 5         | 0           | 1.91     | 273                    | 1              | 1          |
| cellular carbohydrate metabolic process     | 1         | 0           | 0.38     | 274                    | 1              | 1          |
| nitrogen compound biosynthetic process      | 2         | 0           | 0.77     | 275                    | 1              | 1          |
| meiotic chromosome segregation              | 1         | 0           | 0.38     | 276                    | 1              | 1          |
| external encapsulating structure organiz... | 2         | 0           | 0.77     | 277                    | 1              | 1          |
| IMP metabolic process                       | 3         | 0           | 1.15     | 278                    | 1              | 1          |
| nucleobase biosynthetic process             | 1         | 0           | 0.38     | 279                    | 1              | 1          |
| pigment biosynthetic process                | 1         | 0           | 0.38     | 280                    | 1              | 1          |
| alcohol biosynthetic process                | 1         | 0           | 0.38     | 281                    | 1              | 1          |
| amino sugar catabolic process               | 1         | 0           | 0.38     | 282                    | 1              | 1          |
| monosaccharide biosynthetic process         | 1         | 0           | 0.38     | 283                    | 1              | 1          |
| GDP-L-fucose metabolic process              | 1         | 0           | 0.38     | 284                    | 1              | 1          |
| carboxylic acid biosynthetic process        | 1         | 0           | 0.38     | 285                    | 1              | 1          |
| membrane lipid catabolic process            | 2         | 0           | 0.77     | 286                    | 1              | 1          |
| heterocycle metabolic process               | 2         | 0           | 0.77     | 287                    | 1              | 1          |
| embryonic morphogenesis                     | 1         | 0           | 0.38     | 288                    | 1              | 1          |
| cofactor metabolic process                  | 2         | 0           | 0.77     | 289                    | 1              | 1          |
| cofactor biosynthetic process               | 1         | 0           | 0.38     | 290                    | 1              | 1          |
| regulation of multicellular organismal p... | 1         | 0           | 0.38     | 291                    | 1              | 1          |
| positive regulation of multicellular org... | 1         | 0           | 0.38     | 292                    | 1              | 1          |
| chromosome organization                     | 2         | 0           | 0.77     | 293                    | 1              | 1          |
| meiotic cell cycle                          | 1         | 0           | 0.38     | 294                    | 1              | 1          |
| M phase of meiotic cell cycle               | 1         | 0           | 0.38     | 295                    | 1              | 1          |
| cellular response to stimulus               | 2         | 0           | 0.77     | 296                    | 1              | 1          |
| response to protein stimulus                | 2         | 0           | 0.77     | 297                    | 1              | 1          |
| nucleobase, nucleoside and nucleotide me... | 3         | 0           | 1.15     | 298                    | 1              | 1          |
| oxidation reduction                         | 1         | 0           | 0.38     | 299                    | 1              | 1          |
| macromolecular complex assembly             | 2         | 0           | 0.77     | 300                    | 1              | 1          |
| protein-DNA complex assembly                | 2         | 0           | 0.77     | 301                    | 1              | 1          |
| glycosylation                               | 1         | 0           | 0.38     | 302                    | 1              | 1          |
