# Supplementary material for: Genome-Wide Analysis Reveals Novel Genes Essential for Heme Homeostasis in Caenorhabditis elegans
Source: PubMed Central journal article supplement (PMC2912396; doi:10.1371/journal.pgen.1001044), 2010-07-29
Supplement: pgen.1001044.s010.pdf [file pgen.1001044.s010.pdf]

| Term                                        | Annotated | Significant | Expected | Rank in classic Fisher | classic Fisher | elim Fisher |
|---------------------------------------------|-----------|-------------|----------|------------------------|----------------|-------------|
| fatty acid metabolic process                | 3         | 2           | 0.91     | 1                      | 0.22           | 0.22        |
| organic acid metabolic process              | 6         | 3           | 1.83     | 2                      | 0.26           | 0.26        |
| carboxylic acid metabolic process           | 6         | 3           | 1.83     | 3                      | 0.26           | 0.26        |
| lipid metabolic process                     | 9         | 4           | 2.74     | 4                      | 0.27           | 0.27        |
| metabolic process                           | 56        | 19          | 17.04    | 5                      | 0.28           | 0.28        |
| M phase                                     | 1         | 1           | 0.3      | 6                      | 0.3            | 0.3         |
| polysaccharide metabolic process            | 1         | 1           | 0.3      | 7                      | 0.3            | 0.3         |
| chitin metabolic process                    | 1         | 1           | 0.3      | 8                      | 0.3            | 0.3         |
| chitin catabolic process                    | 1         | 1           | 0.3      | 9                      | 0.3            | 0.3         |
| amino sugar metabolic process               | 1         | 1           | 0.3      | 10                     | 0.3            | 0.3         |
| glucosamine metabolic process               | 1         | 1           | 0.3      | 11                     | 0.3            | 0.3         |
| glucosamine catabolic process               | 1         | 1           | 0.3      | 12                     | 0.3            | 0.3         |
| N-acetylglucosamine metabolic process       | 1         | 1           | 0.3      | 13                     | 0.3            | 0.3         |
| N-acetylglucosamine catabolic process       | 1         | 1           | 0.3      | 14                     | 0.3            | 0.3         |
| translation                                 | 1         | 1           | 0.3      | 15                     | 0.3            | 0.3         |
| glutamine metabolic process                 | 1         | 1           | 0.3      | 16                     | 0.3            | 0.3         |
| glutamine biosynthetic process              | 1         | 1           | 0.3      | 17                     | 0.3            | 0.3         |
| acyl-CoA metabolic process                  | 1         | 1           | 0.3      | 18                     | 0.3            | 0.3         |
| cell cycle                                  | 1         | 1           | 0.3      | 19                     | 0.3            | 0.3         |
| chromosome segregation                      | 1         | 1           | 0.3      | 20                     | 0.3            | 0.3         |
| meiosis                                     | 1         | 1           | 0.3      | 21                     | 0.3            | 0.3         |
| glutamine family amino acid metabolic pr... | 1         | 1           | 0.3      | 22                     | 0.3            | 0.3         |
| glutamine family amino acid biosynthetic... | 1         | 1           | 0.3      | 23                     | 0.3            | 0.3         |
| gas transport                               | 1         | 1           | 0.3      | 24                     | 0.3            | 0.3         |
| oxygen transport                            | 1         | 1           | 0.3      | 25                     | 0.3            | 0.3         |
| cell cycle process                          | 1         | 1           | 0.3      | 26                     | 0.3            | 0.3         |
| cell cycle phase                            | 1         | 1           | 0.3      | 27                     | 0.3            | 0.3         |
| meiotic chromosome segregation              | 1         | 1           | 0.3      | 28                     | 0.3            | 0.3         |
| amino sugar catabolic process               | 1         | 1           | 0.3      | 29                     | 0.3            | 0.3         |
| meiotic cell cycle                          | 1         | 1           | 0.3      | 30                     | 0.3            | 0.3         |
| M phase of meiotic cell cycle               | 1         | 1           | 0.3      | 31                     | 0.3            | 0.3         |
| transmembrane transport                     | 1         | 1           | 0.3      | 32                     | 0.3            | 0.3         |
| gene expression                             | 4         | 2           | 1.22     | 33                     | 0.36           | 0.36        |
| monocarboxylic acid metabolic process       | 4         | 2           | 1.22     | 34                     | 0.36           | 0.36        |
| cellular biopolymer biosynthetic process    | 4         | 2           | 1.22     | 35                     | 0.36           | 0.36        |
| biopolymer biosynthetic process             | 4         | 2           | 1.22     | 36                     | 0.36           | 0.36        |
| macromolecule metabolic process             | 23        | 8           | 7        | 37                     | 0.39           | 0.39        |
| biopolymer metabolic process                | 23        | 8           | 7        | 38                     | 0.39           | 0.39        |
| macromolecule biosynthetic process          | 5         | 2           | 1.52     | 39                     | 0.48           | 0.48        |
| cellular macromolecule biosynthetic proc... | 5         | 2           | 1.52     | 40                     | 0.48           | 0.48        |
| cellular lipid metabolic process            | 5         | 2           | 1.52     | 41                     | 0.48           | 0.48        |
| primary metabolic process                   | 41        | 13          | 12.48    | 42                     | 0.49           | 0.49        |
| proteolysis                                 | 15        | 5           | 4.57     | 43                     | 0.5            | 0.5         |
| DNA packaging                               | 2         | 1           | 0.61     | 44                     | 0.52           | 0.52        |
| establishment or maintenance of chromati... | 2         | 1           | 0.61     | 45                     | 0.52           | 0.52        |
| chromatin assembly or disassembly           | 2         | 1           | 0.61     | 46                     | 0.52           | 0.52        |
| nucleosome assembly                         | 2         | 1           | 0.61     | 47                     | 0.52           | 0.52        |
| cellular amino acid and derivative metab... | 2         | 1           | 0.61     | 48                     | 0.52           | 0.52        |
| amino acid metabolic process                | 2         | 1           | 0.61     | 49                     | 0.52           | 0.52        |
| coenzyme metabolic process                  | 2         | 1           | 0.61     | 50                     | 0.52           | 0.52        |
| nitrogen compound metabolic process         | 2         | 1           | 0.61     | 51                     | 0.52           | 0.52        |
| defense response                            | 2         | 1           | 0.61     | 52                     | 0.52           | 0.52        |
| organelle organization                      | 2         | 1           | 0.61     | 53                     | 0.52           | 0.52        |
| amino acid biosynthetic process             | 2         | 1           | 0.61     | 54                     | 0.52           | 0.52        |
| cellular amine metabolic process            | 2         | 1           | 0.61     | 55                     | 0.52           | 0.52        |
| amine biosynthetic process                  | 2         | 1           | 0.61     | 56                     | 0.52           | 0.52        |
| cellular component assembly                 | 2         | 1           | 0.61     | 57                     | 0.52           | 0.52        |
| chromatin assembly                          | 2         | 1           | 0.61     | 58                     | 0.52           | 0.52        |
| cellular macromolecular complex subunit ... | 2         | 1           | 0.61     | 59                     | 0.52           | 0.52        |
| cellular macromolecular complex assembly    | 2         | 1           | 0.61     | 60                     | 0.52           | 0.52        |
| cellular nitrogen compound metabolic pro... | 2         | 1           | 0.61     | 61                     | 0.52           | 0.52        |
| nucleosome organization                     | 2         | 1           | 0.61     | 62                     | 0.52           | 0.52        |
| macromolecular complex subunit organizat... | 2         | 1           | 0.61     | 63                     | 0.52           | 0.52        |
| nitrogen compound biosynthetic process      | 2         | 1           | 0.61     | 64                     | 0.52           | 0.52        |
| cofactor metabolic process                  | 2         | 1           | 0.61     | 65                     | 0.52           | 0.52        |
| chromosome organization                     | 2         | 1           | 0.61     | 66                     | 0.52           | 0.52        |
| macromolecular complex assembly             | 2         | 1           | 0.61     | 67                     | 0.52           | 0.52        |
| protein-DNA complex assembly                | 2         | 1           | 0.61     | 68                     | 0.52           | 0.52        |
| cellular biopolymer metabolic process       | 22        | 7           | 6.7      | 69                     | 0.53           | 0.53        |
| cellular macromolecule metabolic process    | 22        | 7           | 6.7      | 70                     | 0.53           | 0.53        |
| protein metabolic process                   | 19        | 6           | 5.78     | 71                     | 0.55           | 0.55        |
| cellular protein metabolic process          | 19        | 6           | 5.78     | 72                     | 0.55           | 0.55        |
| transport                                   | 17        | 5           | 5.17     | 73                     | 0.64           | 0.64        |
| localization                                | 17        | 5           | 5.17     | 74                     | 0.64           | 0.64        |
| establishment of localization               | 17        | 5           | 5.17     | 75                     | 0.64           | 0.64        |

Table 8

| Term                                        | Annotated  | Significant | Expected     | Rank in classic Fisher | classic Fisher | elim Fisher |
|---------------------------------------------|------------|-------------|--------------|------------------------|----------------|-------------|
| transcription                               | 3          | 1           | 0.91         | 76                     | 0.67           | 0.67        |
| transcription, DNA-dependent                | 3          | 1           | 0.91         | 77                     | 0.67           | 0.67        |
| regulation of transcription, DNA-depende... | 3          | 1           | 0.91         | 78                     | 0.67           | 0.67        |
| regulation of biosynthetic process          | 3          | 1           | 0.91         | 79                     | 0.67           | 0.67        |
| regulation of gene expression               | 3          | 1           | 0.91         | 80                     | 0.67           | 0.67        |
| regulation of macromolecule biosynthetic... | 3          | 1           | 0.91         | 81                     | 0.67           | 0.67        |
| <b>carbohydrate catabolic process</b>       | <b>3</b>   | <b>1</b>    | <b>0.91</b>  | <b>82</b>              | <b>0.67</b>    | <b>0.67</b> |
| RNA metabolic process                       | 3          | 1           | 0.91         | 83                     | 0.67           | 0.67        |
| regulation of nucleobase, nucleoside, nu... | 3          | 1           | 0.91         | 84                     | 0.67           | 0.67        |
| regulation of metabolic process             | 3          | 1           | 0.91         | 85                     | 0.67           | 0.67        |
| regulation of cellular metabolic process    | 3          | 1           | 0.91         | 86                     | 0.67           | 0.67        |
| regulation of cellular biosynthetic proc... | 3          | 1           | 0.91         | 87                     | 0.67           | 0.67        |
| RNA biosynthetic process                    | 3          | 1           | 0.91         | 88                     | 0.67           | 0.67        |
| regulation of transcription                 | 3          | 1           | 0.91         | 89                     | 0.67           | 0.67        |
| regulation of RNA metabolic process         | 3          | 1           | 0.91         | 90                     | 0.67           | 0.67        |
| regulation of macromolecule metabolic pr... | 3          | 1           | 0.91         | 91                     | 0.67           | 0.67        |
| <b>cellular metabolic process</b>           | <b>35</b>  | <b>10</b>   | <b>10.65</b> | <b>92</b>              | <b>0.69</b>    | <b>0.69</b> |
| biosynthetic process                        | 11         | 3           | 3.35         | 93                     | 0.71           | 0.71        |
| locomotion                                  | 11         | 3           | 3.35         | 94                     | 0.71           | 0.71        |
| cellular biosynthetic process               | 11         | 3           | 3.35         | 95                     | 0.71           | 0.71        |
| <b>cellular process</b>                     | <b>46</b>  | <b>13</b>   | <b>14</b>    | <b>96</b>              | <b>0.73</b>    | <b>0.73</b> |
| response to stress                          | 4          | 1           | 1.22         | 97                     | 0.77           | 0.77        |
| cellular component organization             | 4          | 1           | 1.22         | 98                     | 0.77           | 0.77        |
| embryonic development ending in birth or... | 17         | 4           | 5.17         | 99                     | 0.83           | 0.83        |
| nematode larval development                 | 5          | 1           | 1.52         | 100                    | 0.84           | 0.84        |
| larval development                          | 5          | 1           | 1.52         | 101                    | 0.84           | 0.84        |
| <b>catabolic process</b>                    | <b>5</b>   | <b>1</b>    | <b>1.52</b>  | <b>102</b>             | <b>0.84</b>    | <b>0.84</b> |
| post-embryonic development                  | 5          | 1           | 1.52         | 103                    | 0.84           | 0.84        |
| regulation of cellular process              | 5          | 1           | 1.52         | 104                    | 0.84           | 0.84        |
| embryonic development                       | 18         | 4           | 5.48         | 105                    | 0.87           | 0.87        |
| response to stimulus                        | 10         | 2           | 3.04         | 106                    | 0.87           | 0.87        |
| <b>carbohydrate metabolic process</b>       | <b>6</b>   | <b>1</b>    | <b>1.83</b>  | <b>107</b>             | <b>0.89</b>    | <b>0.89</b> |
| behavior                                    | 6          | 1           | 1.83         | 108                    | 0.89           | 0.89        |
| oviposition                                 | 6          | 1           | 1.83         | 109                    | 0.89           | 0.89        |
| reproductive behavior                       | 6          | 1           | 1.83         | 110                    | 0.89           | 0.89        |
| multicellular organism reproduction         | 6          | 1           | 1.83         | 111                    | 0.89           | 0.89        |
| reproductive behavior in a multicellular... | 6          | 1           | 1.83         | 112                    | 0.89           | 0.89        |
| reproductive process in a multicellular ... | 6          | 1           | 1.83         | 113                    | 0.89           | 0.89        |
| aging                                       | 11         | 2           | 3.35         | 114                    | 0.9            | 0.9         |
| determination of adult life span            | 11         | 2           | 3.35         | 115                    | 0.9            | 0.9         |
| multicellular organismal aging              | 11         | 2           | 3.35         | 116                    | 0.9            | 0.9         |
| nucleobase, nucleoside, nucleotide and n... | 7          | 1           | 2.13         | 117                    | 0.93           | 0.93        |
| reproductive process                        | 7          | 1           | 2.13         | 118                    | 0.93           | 0.93        |
| reproduction                                | 13         | 2           | 3.96         | 119                    | 0.95           | 0.95        |
| multicellular organismal development        | 35         | 7           | 10.65        | 120                    | 0.97           | 0.97        |
| multicellular organismal process            | 39         | 8           | 11.87        | 121                    | 0.97           | 0.97        |
| developmental process                       | 37         | 7           | 11.26        | 122                    | 0.98           | 0.98        |
| regulation of biological process            | 23         | 3           | 7            | 123                    | 0.99           | 0.99        |
| regulation of growth rate                   | 19         | 2           | 5.78         | 124                    | 0.99           | 0.99        |
| positive regulation of growth rate          | 19         | 2           | 5.78         | 125                    | 0.99           | 0.99        |
| biological regulation                       | 24         | 3           | 7.3          | 126                    | 0.99           | 0.99        |
| regulation of growth                        | 20         | 2           | 6.09         | 127                    | 1              | 1           |
| positive regulation of growth               | 20         | 2           | 6.09         | 128                    | 1              | 1           |
| positive regulation of biological proces... | 20         | 2           | 6.09         | 129                    | 1              | 1           |
| growth                                      | 23         | 2           | 7            | 130                    | 1              | 1           |
| <b>biological_process</b>                   | <b>115</b> | <b>35</b>   | <b>35</b>    | <b>131</b>             | <b>1</b>       | <b>1</b>    |
| transition metal ion transport              | 1          | 0           | 0.3          | 132                    | 1              | 1           |
| peptidoglycan metabolic process             | 2          | 0           | 0.61         | 133                    | 1              | 1           |
| gastrulation with mouth forming first       | 1          | 0           | 0.3          | 134                    | 1              | 1           |
| cell fate specification                     | 1          | 0           | 0.3          | 135                    | 1              | 1           |
| morphogenesis of an epithelium              | 1          | 0           | 0.3          | 136                    | 1              | 1           |
| reproductive developmental process          | 2          | 0           | 0.61         | 137                    | 1              | 1           |
| monosaccharide metabolic process            | 1          | 0           | 0.3          | 138                    | 1              | 1           |
| fucose metabolic process                    | 1          | 0           | 0.3          | 139                    | 1              | 1           |
| L-fucose biosynthetic process               | 1          | 0           | 0.3          | 140                    | 1              | 1           |
| mannose metabolic process                   | 1          | 0           | 0.3          | 141                    | 1              | 1           |
| cellular alcohol metabolic process          | 1          | 0           | 0.3          | 142                    | 1              | 1           |
| purine base metabolic process               | 1          | 0           | 0.3          | 143                    | 1              | 1           |
| purine nucleotide metabolic process         | 3          | 0           | 0.91         | 144                    | 1              | 1           |
| purine nucleotide biosynthetic process      | 3          | 0           | 0.91         | 145                    | 1              | 1           |
| IMP biosynthetic process                    | 3          | 0           | 0.91         | 146                    | 1              | 1           |
| 'de novo' IMP biosynthetic process          | 2          | 0           | 0.61         | 147                    | 1              | 1           |
| protein folding                             | 1          | 0           | 0.3          | 148                    | 1              | 1           |
| protein modification process                | 3          | 0           | 0.91         | 149                    | 1              | 1           |
| protein amino acid phosphorylation          | 1          | 0           | 0.3          | 150                    | 1              | 1           |

Table 8 (contd)

| Term                                        | Annotated | Significant | Expected | Rank in classic Fisher | classic Fisher | elim Fisher |
|---------------------------------------------|-----------|-------------|----------|------------------------|----------------|-------------|
| protein amino acid glycosylation            | 1         | 0           | 0.3      | 151                    | 1              | 1           |
| asparagine metabolic process                | 1         | 0           | 0.3      | 152                    | 1              | 1           |
| asparagine biosynthetic process             | 1         | 0           | 0.3      | 153                    | 1              | 1           |
| fatty acid biosynthetic process             | 1         | 0           | 0.3      | 154                    | 1              | 1           |
| membrane lipid metabolic process            | 2         | 0           | 0.61     | 155                    | 1              | 1           |
| phospholipid metabolic process              | 2         | 0           | 0.61     | 156                    | 1              | 1           |
| sphingolipid metabolic process              | 2         | 0           | 0.61     | 157                    | 1              | 1           |
| sphingomyelin metabolic process             | 2         | 0           | 0.61     | 158                    | 1              | 1           |
| sphingomyelin catabolic process             | 2         | 0           | 0.61     | 159                    | 1              | 1           |
| cellular aromatic compound metabolic pro... | 2         | 0           | 0.61     | 160                    | 1              | 1           |
| group transfer coenzyme metabolic proces... | 1         | 0           | 0.3      | 161                    | 1              | 1           |
| nucleoside phosphate metabolic process      | 3         | 0           | 0.91     | 162                    | 1              | 1           |
| folic acid and derivative metabolic proc... | 1         | 0           | 0.3      | 163                    | 1              | 1           |
| phosphorus metabolic process                | 2         | 0           | 0.61     | 164                    | 1              | 1           |
| phosphate metabolic process                 | 2         | 0           | 0.61     | 165                    | 1              | 1           |
| ion transport                               | 3         | 0           | 0.91     | 166                    | 1              | 1           |
| cation transport                            | 2         | 0           | 0.61     | 167                    | 1              | 1           |
| sodium ion transport                        | 1         | 0           | 0.3      | 168                    | 1              | 1           |
| phosphate transport                         | 1         | 0           | 0.3      | 169                    | 1              | 1           |
| anion transport                             | 1         | 0           | 0.3      | 170                    | 1              | 1           |
| iron ion transport                          | 1         | 0           | 0.3      | 171                    | 1              | 1           |
| lipid transport                             | 6         | 0           | 1.83     | 172                    | 1              | 1           |
| cellular ion homeostasis                    | 1         | 0           | 0.3      | 173                    | 1              | 1           |
| cellular iron ion homeostasis               | 1         | 0           | 0.3      | 174                    | 1              | 1           |
| ER-nuclear signaling pathway                | 2         | 0           | 0.61     | 175                    | 1              | 1           |
| response to unfolded protein                | 2         | 0           | 0.61     | 176                    | 1              | 1           |
| cell wall organization                      | 2         | 0           | 0.61     | 177                    | 1              | 1           |
| cell communication                          | 3         | 0           | 0.91     | 178                    | 1              | 1           |
| cell adhesion                               | 1         | 0           | 0.3      | 179                    | 1              | 1           |
| cell-matrix adhesion                        | 1         | 0           | 0.3      | 180                    | 1              | 1           |
| signal transduction                         | 2         | 0           | 0.61     | 181                    | 1              | 1           |
| intracellular signaling cascade             | 2         | 0           | 0.61     | 182                    | 1              | 1           |
| gastrulation                                | 1         | 0           | 0.3      | 183                    | 1              | 1           |
| pattern specification process               | 1         | 0           | 0.3      | 184                    | 1              | 1           |
| sex differentiation                         | 2         | 0           | 0.61     | 185                    | 1              | 1           |
| protein-based cuticle development           | 1         | 0           | 0.3      | 186                    | 1              | 1           |
| lipid biosynthetic process                  | 1         | 0           | 0.3      | 187                    | 1              | 1           |
| aspartate family amino acid metabolic pr... | 1         | 0           | 0.3      | 188                    | 1              | 1           |
| aspartate family amino acid biosynthetic... | 1         | 0           | 0.3      | 189                    | 1              | 1           |
| glycoprotein metabolic process              | 1         | 0           | 0.3      | 190                    | 1              | 1           |
| glycoprotein biosynthetic process           | 1         | 0           | 0.3      | 191                    | 1              | 1           |
| coenzyme biosynthetic process               | 1         | 0           | 0.3      | 192                    | 1              | 1           |
| nucleobase metabolic process                | 1         | 0           | 0.3      | 193                    | 1              | 1           |
| purine base biosynthetic process            | 1         | 0           | 0.3      | 194                    | 1              | 1           |
| nucleotide metabolic process                | 3         | 0           | 0.91     | 195                    | 1              | 1           |
| nucleoside monophosphate metabolic proce... | 3         | 0           | 0.91     | 196                    | 1              | 1           |
| nucleoside monophosphate biosynthetic pr... | 3         | 0           | 0.91     | 197                    | 1              | 1           |
| purine nucleoside monophosphate metaboli... | 3         | 0           | 0.91     | 198                    | 1              | 1           |
| purine nucleoside monophosphate biosynth... | 3         | 0           | 0.91     | 199                    | 1              | 1           |
| purine ribonucleotide metabolic process     | 3         | 0           | 0.91     | 200                    | 1              | 1           |
| purine ribonucleotide biosynthetic proce... | 3         | 0           | 0.91     | 201                    | 1              | 1           |
| ribonucleoside monophosphate biosyntheti... | 3         | 0           | 0.91     | 202                    | 1              | 1           |
| ribonucleoside monophosphate metabolic p... | 3         | 0           | 0.91     | 203                    | 1              | 1           |
| nucleotide biosynthetic process             | 3         | 0           | 0.91     | 204                    | 1              | 1           |
| purine ribonucleoside monophosphate meta... | 3         | 0           | 0.91     | 205                    | 1              | 1           |
| purine ribonucleoside monophosphate bios... | 3         | 0           | 0.91     | 206                    | 1              | 1           |
| nucleotide-sugar metabolic process          | 1         | 0           | 0.3      | 207                    | 1              | 1           |
| nucleotide-sugar biosynthetic process       | 1         | 0           | 0.3      | 208                    | 1              | 1           |
| peptidoglycan catabolic process             | 2         | 0           | 0.61     | 209                    | 1              | 1           |
| ribonucleotide metabolic process            | 3         | 0           | 0.91     | 210                    | 1              | 1           |
| ribonucleotide biosynthetic process         | 3         | 0           | 0.91     | 211                    | 1              | 1           |
| phospholipid catabolic process              | 2         | 0           | 0.61     | 212                    | 1              | 1           |
| folic acid and derivative biosynthetic p... | 1         | 0           | 0.3      | 213                    | 1              | 1           |
| response to biotic stimulus                 | 2         | 0           | 0.61     | 214                    | 1              | 1           |
| anatomical structure morphogenesis          | 5         | 0           | 1.52     | 215                    | 1              | 1           |
| embryonic pattern specification             | 1         | 0           | 0.3      | 216                    | 1              | 1           |
| body morphogenesis                          | 3         | 0           | 0.91     | 217                    | 1              | 1           |
| monovalent inorganic cation transport       | 1         | 0           | 0.3      | 218                    | 1              | 1           |
| di-, tri-valent inorganic cation transpo... | 1         | 0           | 0.3      | 219                    | 1              | 1           |
| inorganic anion transport                   | 1         | 0           | 0.3      | 220                    | 1              | 1           |
| lipid catabolic process                     | 2         | 0           | 0.61     | 221                    | 1              | 1           |
| carbohydrate biosynthetic process           | 1         | 0           | 0.3      | 222                    | 1              | 1           |
| organic acid biosynthetic process           | 1         | 0           | 0.3      | 223                    | 1              | 1           |
| phosphorylation                             | 1         | 0           | 0.3      | 224                    | 1              | 1           |
| protein processing                          | 1         | 0           | 0.3      | 225                    | 1              | 1           |
| intein-mediated protein splicing            | 1         | 0           | 0.3      | 226                    | 1              | 1           |

Table 8 (contd)

| Term                                        | Annotated | Significant | Expected | Rank in classic Fisher | classic Fisher | elim Fisher |
|---------------------------------------------|-----------|-------------|----------|------------------------|----------------|-------------|
| cell wall catabolic process                 | 2         | 0           | 0.61     | 227                    | 1              | 1           |
| molting cycle, protein-based cuticle        | 1         | 0           | 0.3      | 228                    | 1              | 1           |
| molting cycle, collagen and cuticulin-ba... | 1         | 0           | 0.3      | 229                    | 1              | 1           |
| hexose metabolic process                    | 1         | 0           | 0.3      | 230                    | 1              | 1           |
| hexose biosynthetic process                 | 1         | 0           | 0.3      | 231                    | 1              | 1           |
| GDP-mannose metabolic process               | 1         | 0           | 0.3      | 232                    | 1              | 1           |
| cellular homeostasis                        | 1         | 0           | 0.3      | 233                    | 1              | 1           |
| biological adhesion                         | 1         | 0           | 0.3      | 234                    | 1              | 1           |
| metal ion transport                         | 2         | 0           | 0.61     | 235                    | 1              | 1           |
| cellular cation homeostasis                 | 1         | 0           | 0.3      | 236                    | 1              | 1           |
| cellular di-, tri-valent inorganic catio... | 1         | 0           | 0.3      | 237                    | 1              | 1           |
| sphingolipid catabolic process              | 2         | 0           | 0.61     | 238                    | 1              | 1           |
| cell differentiation                        | 1         | 0           | 0.3      | 239                    | 1              | 1           |
| protein splicing                            | 1         | 0           | 0.3      | 240                    | 1              | 1           |
| endoplasmic reticulum unfolded protein r... | 2         | 0           | 0.61     | 241                    | 1              | 1           |
| cell-substrate adhesion                     | 1         | 0           | 0.3      | 242                    | 1              | 1           |
| cellular response to stress                 | 2         | 0           | 0.61     | 243                    | 1              | 1           |
| nucleobase, nucleoside and nucleotide bi... | 1         | 0           | 0.3      | 244                    | 1              | 1           |
| cellular response to unfolded protein       | 2         | 0           | 0.61     | 245                    | 1              | 1           |
| cellular carbohydrate biosynthetic proce... | 1         | 0           | 0.3      | 246                    | 1              | 1           |
| nucleobase, nucleoside, nucleotide and n... | 1         | 0           | 0.3      | 247                    | 1              | 1           |
| response to endoplasmic reticulum stress    | 2         | 0           | 0.61     | 248                    | 1              | 1           |
| multicellular organism growth               | 1         | 0           | 0.3      | 249                    | 1              | 1           |
| collagen and cuticulin-based cuticle dev... | 1         | 0           | 0.3      | 250                    | 1              | 1           |
| regulation of locomotion                    | 1         | 0           | 0.3      | 251                    | 1              | 1           |
| regulation of multicellular organism gro... | 1         | 0           | 0.3      | 252                    | 1              | 1           |
| positive regulation of locomotion           | 1         | 0           | 0.3      | 253                    | 1              | 1           |
| positive regulation of multicellular org... | 1         | 0           | 0.3      | 254                    | 1              | 1           |
| hermaphrodite genitalia development         | 2         | 0           | 0.61     | 255                    | 1              | 1           |
| response to chemical stimulus               | 2         | 0           | 0.61     | 256                    | 1              | 1           |
| molting cycle                               | 1         | 0           | 0.3      | 257                    | 1              | 1           |
| cuticle development                         | 1         | 0           | 0.3      | 258                    | 1              | 1           |
| GDP-L-fucose biosynthetic process           | 1         | 0           | 0.3      | 259                    | 1              | 1           |
| fucose biosynthetic process                 | 1         | 0           | 0.3      | 260                    | 1              | 1           |
| L-fucose metabolic process                  | 1         | 0           | 0.3      | 261                    | 1              | 1           |
| pigment metabolic process                   | 1         | 0           | 0.3      | 262                    | 1              | 1           |
| homeostatic process                         | 1         | 0           | 0.3      | 263                    | 1              | 1           |
| biopolymer modification                     | 3         | 0           | 0.91     | 264                    | 1              | 1           |
| biopolymer glycosylation                    | 1         | 0           | 0.3      | 265                    | 1              | 1           |
| post-translational protein modification     | 2         | 0           | 0.61     | 266                    | 1              | 1           |
| cell wall metabolic process                 | 2         | 0           | 0.61     | 267                    | 1              | 1           |
| cellular lipid catabolic process            | 2         | 0           | 0.61     | 268                    | 1              | 1           |
| cellular catabolic process                  | 2         | 0           | 0.61     | 269                    | 1              | 1           |
| cellular carbohydrate metabolic process     | 1         | 0           | 0.3      | 270                    | 1              | 1           |
| cell fate commitment                        | 1         | 0           | 0.3      | 271                    | 1              | 1           |
| external encapsulating structure organiz... | 2         | 0           | 0.61     | 272                    | 1              | 1           |
| IMP metabolic process                       | 3         | 0           | 0.91     | 273                    | 1              | 1           |
| nucleobase biosynthetic process             | 1         | 0           | 0.3      | 274                    | 1              | 1           |
| pigment biosynthetic process                | 1         | 0           | 0.3      | 275                    | 1              | 1           |
| alcohol biosynthetic process                | 1         | 0           | 0.3      | 276                    | 1              | 1           |
| monosaccharide biosynthetic process         | 1         | 0           | 0.3      | 277                    | 1              | 1           |
| GDP-L-fucose metabolic process              | 1         | 0           | 0.3      | 278                    | 1              | 1           |
| carboxylic acid biosynthetic process        | 1         | 0           | 0.3      | 279                    | 1              | 1           |
| membrane lipid catabolic process            | 2         | 0           | 0.61     | 280                    | 1              | 1           |
| heterocycle metabolic process               | 2         | 0           | 0.61     | 281                    | 1              | 1           |
| organ development                           | 2         | 0           | 0.61     | 282                    | 1              | 1           |
| embryonic morphogenesis                     | 1         | 0           | 0.3      | 283                    | 1              | 1           |
| system development                          | 2         | 0           | 0.61     | 284                    | 1              | 1           |
| genitalia development                       | 2         | 0           | 0.61     | 285                    | 1              | 1           |
| anatomical structure development            | 7         | 0           | 2.13     | 286                    | 1              | 1           |
| cellular developmental process              | 1         | 0           | 0.3      | 287                    | 1              | 1           |
| chemical homeostasis                        | 1         | 0           | 0.3      | 288                    | 1              | 1           |
| ion homeostasis                             | 1         | 0           | 0.3      | 289                    | 1              | 1           |
| cofactor biosynthetic process               | 1         | 0           | 0.3      | 290                    | 1              | 1           |
| regulation of multicellular organismal p... | 1         | 0           | 0.3      | 291                    | 1              | 1           |
| positive regulation of multicellular org... | 1         | 0           | 0.3      | 292                    | 1              | 1           |
| cellular response to stimulus               | 2         | 0           | 0.61     | 293                    | 1              | 1           |
| response to protein stimulus                | 2         | 0           | 0.61     | 294                    | 1              | 1           |
| di-, tri-valent inorganic cation homeost... | 1         | 0           | 0.3      | 295                    | 1              | 1           |
| iron ion homeostasis                        | 1         | 0           | 0.3      | 296                    | 1              | 1           |
| cation homeostasis                          | 1         | 0           | 0.3      | 297                    | 1              | 1           |
| cellular chemical homeostasis               | 1         | 0           | 0.3      | 298                    | 1              | 1           |
| nucleobase, nucleoside and nucleotide me... | 3         | 0           | 0.91     | 299                    | 1              | 1           |
| oxidation reduction                         | 1         | 0           | 0.3      | 300                    | 1              | 1           |
| regulation of biological quality            | 1         | 0           | 0.3      | 301                    | 1              | 1           |
| glycosylation                               | 1         | 0           | 0.3      | 302                    | 1              | 1           |

Table 8 (contd)
