# Supplementary material for: Genome-Wide Analysis Reveals Novel Genes Essential for Heme Homeostasis in Caenorhabditis elegans
Source: PubMed Central journal article supplement (PMC2912396; doi:10.1371/journal.pgen.1001044), 2010-07-29
Supplement: pgen.1001044.s011.pdf [file pgen.1001044.s011.pdf]

| Term                                        | Annotated | Significant | Expected | Rank in classic Fisher | classic Fisher | elim Fisher |
|---------------------------------------------|-----------|-------------|----------|------------------------|----------------|-------------|
| purine nucleotide metabolic process         | 3         | 3           | 0.97     | 1                      | 0.031          | 0.031       |
| purine nucleotide biosynthetic process      | 3         | 3           | 0.97     | 2                      | 0.031          | 0.031       |
| IMP biosynthetic process                    | 3         | 3           | 0.97     | 3                      | 0.031          | 0.031       |
| nucleoside phosphate metabolic process      | 3         | 3           | 0.97     | 4                      | 0.031          | 0.031       |
| nucleotide metabolic process                | 3         | 3           | 0.97     | 5                      | 0.031          | 0.031       |
| nucleoside monophosphate metabolic proce... | 3         | 3           | 0.97     | 6                      | 0.031          | 0.031       |
| nucleoside monophosphate biosynthetic pr... | 3         | 3           | 0.97     | 7                      | 0.031          | 0.031       |
| purine nucleoside monophosphate metaboli... | 3         | 3           | 0.97     | 8                      | 0.031          | 0.031       |
| purine nucleoside monophosphate biosynth... | 3         | 3           | 0.97     | 9                      | 0.031          | 0.031       |
| purine ribonucleotide metabolic process     | 3         | 3           | 0.97     | 10                     | 0.031          | 0.031       |
| purine ribonucleotide biosynthetic proce... | 3         | 3           | 0.97     | 11                     | 0.031          | 0.031       |
| ribonucleoside monophosphate biosyntheti... | 3         | 3           | 0.97     | 12                     | 0.031          | 0.031       |
| ribonucleoside monophosphate metabolic p... | 3         | 3           | 0.97     | 13                     | 0.031          | 0.031       |
| nucleotide biosynthetic process             | 3         | 3           | 0.97     | 14                     | 0.031          | 0.031       |
| purine ribonucleoside monophosphate meta... | 3         | 3           | 0.97     | 15                     | 0.031          | 0.031       |
| purine ribonucleoside monophosphate bios... | 3         | 3           | 0.97     | 16                     | 0.031          | 0.031       |
| ribonucleotide metabolic process            | 3         | 3           | 0.97     | 17                     | 0.031          | 0.031       |
| ribonucleotide biosynthetic process         | 3         | 3           | 0.97     | 18                     | 0.031          | 0.031       |
| IMP metabolic process                       | 3         | 3           | 0.97     | 19                     | 0.031          | 0.031       |
| nucleobase, nucleoside and nucleotide me... | 3         | 3           | 0.97     | 20                     | 0.031          | 0.031       |
| nucleobase, nucleoside, nucleotide and n... | 7         | 5           | 2.25     | 21                     | 0.034          | 0.034       |
| carbohydrate metabolic process              | 6         | 4           | 1.93     | 22                     | 0.083          | 0.083       |
| biosynthetic process                        | 11        | 6           | 3.54     | 23                     | 0.094          | 0.094       |
| cellular biosynthetic process               | 11        | 6           | 3.54     | 24                     | 0.094          | 0.094       |
| 'de novo' IMP biosynthetic process          | 2         | 2           | 0.64     | 25                     | 0.102          | 0.102       |
| cellular aromatic compound metabolic pro... | 2         | 2           | 0.64     | 26                     | 0.102          | 0.102       |
| phosphorus metabolic process                | 2         | 2           | 0.64     | 27                     | 0.102          | 0.102       |
| phosphate metabolic process                 | 2         | 2           | 0.64     | 28                     | 0.102          | 0.102       |
| heterocycle metabolic process               | 2         | 2           | 0.64     | 29                     | 0.102          | 0.102       |
| reproduction                                | 13        | 6           | 4.18     | 30                     | 0.201          | 0.201       |
| protein modification process                | 3         | 2           | 0.97     | 31                     | 0.242          | 0.242       |
| ion transport                               | 3         | 2           | 0.97     | 32                     | 0.242          | 0.242       |
| biopolymer modification                     | 3         | 2           | 0.97     | 33                     | 0.242          | 0.242       |
| growth                                      | 23        | 9           | 7.4      | 34                     | 0.288          | 0.288       |
| behavior                                    | 6         | 3           | 1.93     | 35                     | 0.293          | 0.293       |
| oviposition                                 | 6         | 3           | 1.93     | 36                     | 0.293          | 0.293       |
| reproductive behavior                       | 6         | 3           | 1.93     | 37                     | 0.293          | 0.293       |
| multicellular organism reproduction         | 6         | 3           | 1.93     | 38                     | 0.293          | 0.293       |
| reproductive behavior in a multicellular... | 6         | 3           | 1.93     | 39                     | 0.293          | 0.293       |
| reproductive process in a multicellular ... | 6         | 3           | 1.93     | 40                     | 0.293          | 0.293       |
| gastrulation with mouth forming first       | 1         | 1           | 0.32     | 41                     | 0.322          | 0.322       |
| monosaccharide metabolic process            | 1         | 1           | 0.32     | 42                     | 0.322          | 0.322       |
| fucose metabolic process                    | 1         | 1           | 0.32     | 43                     | 0.322          | 0.322       |
| L-fucose biosynthetic process               | 1         | 1           | 0.32     | 44                     | 0.322          | 0.322       |
| mannose metabolic process                   | 1         | 1           | 0.32     | 45                     | 0.322          | 0.322       |
| cellular alcohol metabolic process          | 1         | 1           | 0.32     | 46                     | 0.322          | 0.322       |
| purine base metabolic process               | 1         | 1           | 0.32     | 47                     | 0.322          | 0.322       |
| protein amino acid phosphorylation          | 1         | 1           | 0.32     | 48                     | 0.322          | 0.322       |
| protein amino acid glycosylation            | 1         | 1           | 0.32     | 49                     | 0.322          | 0.322       |
| asparagine metabolic process                | 1         | 1           | 0.32     | 50                     | 0.322          | 0.322       |
| asparagine biosynthetic process             | 1         | 1           | 0.32     | 51                     | 0.322          | 0.322       |
| group transfer coenzyme metabolic proces... | 1         | 1           | 0.32     | 52                     | 0.322          | 0.322       |
| folic acid and derivative metabolic proc... | 1         | 1           | 0.32     | 53                     | 0.322          | 0.322       |
| sodium ion transport                        | 1         | 1           | 0.32     | 54                     | 0.322          | 0.322       |
| phosphate transport                         | 1         | 1           | 0.32     | 55                     | 0.322          | 0.322       |
| anion transport                             | 1         | 1           | 0.32     | 56                     | 0.322          | 0.322       |
| cell adhesion                               | 1         | 1           | 0.32     | 57                     | 0.322          | 0.322       |
| cell-matrix adhesion                        | 1         | 1           | 0.32     | 58                     | 0.322          | 0.322       |
| gastrulation                                | 1         | 1           | 0.32     | 59                     | 0.322          | 0.322       |
| aspartate family amino acid metabolic pr... | 1         | 1           | 0.32     | 60                     | 0.322          | 0.322       |
| aspartate family amino acid biosynthetic... | 1         | 1           | 0.32     | 61                     | 0.322          | 0.322       |
| glycoprotein metabolic process              | 1         | 1           | 0.32     | 62                     | 0.322          | 0.322       |
| glycoprotein biosynthetic process           | 1         | 1           | 0.32     | 63                     | 0.322          | 0.322       |
| coenzyme biosynthetic process               | 1         | 1           | 0.32     | 64                     | 0.322          | 0.322       |
| nucleobase metabolic process                | 1         | 1           | 0.32     | 65                     | 0.322          | 0.322       |
| purine base biosynthetic process            | 1         | 1           | 0.32     | 66                     | 0.322          | 0.322       |
| nucleotide-sugar metabolic process          | 1         | 1           | 0.32     | 67                     | 0.322          | 0.322       |
| nucleotide-sugar biosynthetic process       | 1         | 1           | 0.32     | 68                     | 0.322          | 0.322       |
| folic acid and derivative biosynthetic p... | 1         | 1           | 0.32     | 69                     | 0.322          | 0.322       |
| monovalent inorganic cation transport       | 1         | 1           | 0.32     | 70                     | 0.322          | 0.322       |
| inorganic anion transport                   | 1         | 1           | 0.32     | 71                     | 0.322          | 0.322       |
| carbohydrate biosynthetic process           | 1         | 1           | 0.32     | 72                     | 0.322          | 0.322       |
| phosphorylation                             | 1         | 1           | 0.32     | 73                     | 0.322          | 0.322       |
| hexose metabolic process                    | 1         | 1           | 0.32     | 74                     | 0.322          | 0.322       |
| hexose biosynthetic process                 | 1         | 1           | 0.32     | 75                     | 0.322          | 0.322       |

Table 9

| Term                                        | Annotated | Significant | Expected     | Rank in classic Fisher | classic Fisher | elim Fisher  |
|---------------------------------------------|-----------|-------------|--------------|------------------------|----------------|--------------|
| GDP-mannose metabolic process               | 1         | 1           | 0.32         | 76                     | 0.322          | 0.322        |
| biological adhesion                         | 1         | 1           | 0.32         | 77                     | 0.322          | 0.322        |
| cell-substrate adhesion                     | 1         | 1           | 0.32         | 78                     | 0.322          | 0.322        |
| nucleobase, nucleoside and nucleotide bi... | 1         | 1           | 0.32         | 79                     | 0.322          | 0.322        |
| cellular carbohydrate biosynthetic proce... | 1         | 1           | 0.32         | 80                     | 0.322          | 0.322        |
| nucleobase, nucleoside, nucleotide and n... | 1         | 1           | 0.32         | 81                     | 0.322          | 0.322        |
| GDP-L-fucose biosynthetic process           | 1         | 1           | 0.32         | 82                     | 0.322          | 0.322        |
| fucose biosynthetic process                 | 1         | 1           | 0.32         | 83                     | 0.322          | 0.322        |
| L-fucose metabolic process                  | 1         | 1           | 0.32         | 84                     | 0.322          | 0.322        |
| pigment metabolic process                   | 1         | 1           | 0.32         | 85                     | 0.322          | 0.322        |
| biopolymer glycosylation                    | 1         | 1           | 0.32         | 86                     | 0.322          | 0.322        |
| cellular carbohydrate metabolic process     | 1         | 1           | 0.32         | 87                     | 0.322          | 0.322        |
| nucleobase biosynthetic process             | 1         | 1           | 0.32         | 88                     | 0.322          | 0.322        |
| pigment biosynthetic process                | 1         | 1           | 0.32         | 89                     | 0.322          | 0.322        |
| alcohol biosynthetic process                | 1         | 1           | 0.32         | 90                     | 0.322          | 0.322        |
| monosaccharide biosynthetic process         | 1         | 1           | 0.32         | 91                     | 0.322          | 0.322        |
| GDP-L-fucose metabolic process              | 1         | 1           | 0.32         | 92                     | 0.322          | 0.322        |
| embryonic morphogenesis                     | 1         | 1           | 0.32         | 93                     | 0.322          | 0.322        |
| cofactor biosynthetic process               | 1         | 1           | 0.32         | 94                     | 0.322          | 0.322        |
| glycosylation                               | 1         | 1           | 0.32         | 95                     | 0.322          | 0.322        |
| cellular component organization             | 4         | 2           | 1.29         | 96                     | 0.387          | 0.387        |
| reproductive process                        | 7         | 3           | 2.25         | 97                     | 0.402          | 0.402        |
| regulation of growth rate                   | 19        | 7           | 6.11         | 98                     | 0.41           | 0.41         |
| positive regulation of growth rate          | 19        | 7           | 6.11         | 99                     | 0.41           | 0.41         |
| <b>cellular metabolic process</b>           | <b>35</b> | <b>12</b>   | <b>11.26</b> | <b>100</b>             | <b>0.455</b>   | <b>0.455</b> |
| regulation of biological process            | 23        | 8           | 7.4          | 101                    | 0.473          | 0.473        |
| regulation of growth                        | 20        | 7           | 6.43         | 102                    | 0.478          | 0.478        |
| positive regulation of growth               | 20        | 7           | 6.43         | 103                    | 0.478          | 0.478        |
| positive regulation of biological proces... | 20        | 7           | 6.43         | 104                    | 0.478          | 0.478        |
| transport                                   | 17        | 6           | 5.47         | 105                    | 0.484          | 0.484        |
| localization                                | 17        | 6           | 5.47         | 106                    | 0.484          | 0.484        |
| establishment of localization               | 17        | 6           | 5.47         | 107                    | 0.484          | 0.484        |
| nematode larval development                 | 5         | 2           | 1.61         | 108                    | 0.519          | 0.519        |
| larval development                          | 5         | 2           | 1.61         | 109                    | 0.519          | 0.519        |
| macromolecule biosynthetic process          | 5         | 2           | 1.61         | 110                    | 0.519          | 0.519        |
| anatomical structure morphogenesis          | 5         | 2           | 1.61         | 111                    | 0.519          | 0.519        |
| post-embryonic development                  | 5         | 2           | 1.61         | 112                    | 0.519          | 0.519        |
| cellular macromolecule biosynthetic proc... | 5         | 2           | 1.61         | 113                    | 0.519          | 0.519        |
| biological regulation                       | 24        | 8           | 7.72         | 114                    | 0.536          | 0.536        |
| peptidoglycan metabolic process             | 2         | 1           | 0.64         | 115                    | 0.542          | 0.542        |
| DNA packaging                               | 2         | 1           | 0.64         | 116                    | 0.542          | 0.542        |
| establishment or maintenance of chromati... | 2         | 1           | 0.64         | 117                    | 0.542          | 0.542        |
| chromatin assembly or disassembly           | 2         | 1           | 0.64         | 118                    | 0.542          | 0.542        |
| nucleosome assembly                         | 2         | 1           | 0.64         | 119                    | 0.542          | 0.542        |
| cellular amino acid and derivative metab... | 2         | 1           | 0.64         | 120                    | 0.542          | 0.542        |
| amino acid metabolic process                | 2         | 1           | 0.64         | 121                    | 0.542          | 0.542        |
| coenzyme metabolic process                  | 2         | 1           | 0.64         | 122                    | 0.542          | 0.542        |
| nitrogen compound metabolic process         | 2         | 1           | 0.64         | 123                    | 0.542          | 0.542        |
| cation transport                            | 2         | 1           | 0.64         | 124                    | 0.542          | 0.542        |
| organelle organization                      | 2         | 1           | 0.64         | 125                    | 0.542          | 0.542        |
| cell wall organization                      | 2         | 1           | 0.64         | 126                    | 0.542          | 0.542        |
| amino acid biosynthetic process             | 2         | 1           | 0.64         | 127                    | 0.542          | 0.542        |
| peptidoglycan catabolic process             | 2         | 1           | 0.64         | 128                    | 0.542          | 0.542        |
| cellular amine metabolic process            | 2         | 1           | 0.64         | 129                    | 0.542          | 0.542        |
| amine biosynthetic process                  | 2         | 1           | 0.64         | 130                    | 0.542          | 0.542        |
| cell wall catabolic process                 | 2         | 1           | 0.64         | 131                    | 0.542          | 0.542        |
| cellular component assembly                 | 2         | 1           | 0.64         | 132                    | 0.542          | 0.542        |
| metal ion transport                         | 2         | 1           | 0.64         | 133                    | 0.542          | 0.542        |
| chromatin assembly                          | 2         | 1           | 0.64         | 134                    | 0.542          | 0.542        |
| cellular macromolecular complex subunit ... | 2         | 1           | 0.64         | 135                    | 0.542          | 0.542        |
| cellular macromolecular complex assembly    | 2         | 1           | 0.64         | 136                    | 0.542          | 0.542        |
| cellular nitrogen compound metabolic pro... | 2         | 1           | 0.64         | 137                    | 0.542          | 0.542        |
| nucleosome organization                     | 2         | 1           | 0.64         | 138                    | 0.542          | 0.542        |
| post-translational protein modification     | 2         | 1           | 0.64         | 139                    | 0.542          | 0.542        |
| macromolecular complex subunit organizat... | 2         | 1           | 0.64         | 140                    | 0.542          | 0.542        |
| cell wall metabolic process                 | 2         | 1           | 0.64         | 141                    | 0.542          | 0.542        |
| nitrogen compound biosynthetic process      | 2         | 1           | 0.64         | 142                    | 0.542          | 0.542        |
| external encapsulating structure organiz... | 2         | 1           | 0.64         | 143                    | 0.542          | 0.542        |
| cofactor metabolic process                  | 2         | 1           | 0.64         | 144                    | 0.542          | 0.542        |
| chromosome organization                     | 2         | 1           | 0.64         | 145                    | 0.542          | 0.542        |
| macromolecular complex assembly             | 2         | 1           | 0.64         | 146                    | 0.542          | 0.542        |
| protein-DNA complex assembly                | 2         | 1           | 0.64         | 147                    | 0.542          | 0.542        |
| <b>cellular process</b>                     | <b>46</b> | <b>15</b>   | <b>14.8</b>  | <b>148</b>             | <b>0.547</b>   | <b>0.547</b> |
| organic acid metabolic process              | 6         | 2           | 1.93         | 149                    | 0.631          | 0.631        |
| lipid transport                             | 6         | 2           | 1.93         | 150                    | 0.631          | 0.631        |
| carboxylic acid metabolic process           | 6         | 2           | 1.93         | 151                    | 0.631          | 0.631        |

Table 9 (contd)

| Term                                        | Annotated  | Significant | Expected     | Rank in classic Fisher | classic Fisher | elim Fisher  |
|---------------------------------------------|------------|-------------|--------------|------------------------|----------------|--------------|
| multicellular organismal process            | 39         | 12          | 12.55        | 152                    | 0.668          | 0.668        |
| response to stimulus                        | 10         | 3           | 3.22         | 153                    | 0.683          | 0.683        |
| transcription                               | 3          | 1           | 0.97         | 154                    | 0.692          | 0.692        |
| transcription, DNA-dependent                | 3          | 1           | 0.97         | 155                    | 0.692          | 0.692        |
| regulation of transcription, DNA-depende... | 3          | 1           | 0.97         | 156                    | 0.692          | 0.692        |
| regulation of biosynthetic process          | 3          | 1           | 0.97         | 157                    | 0.692          | 0.692        |
| body morphogenesis                          | 3          | 1           | 0.97         | 158                    | 0.692          | 0.692        |
| regulation of gene expression               | 3          | 1           | 0.97         | 159                    | 0.692          | 0.692        |
| regulation of macromolecule biosynthetic... | 3          | 1           | 0.97         | 160                    | 0.692          | 0.692        |
| carbohydrate catabolic process              | 3          | 1           | 0.97         | 161                    | 0.692          | 0.692        |
| RNA metabolic process                       | 3          | 1           | 0.97         | 162                    | 0.692          | 0.692        |
| regulation of nucleobase, nucleoside, nu... | 3          | 1           | 0.97         | 163                    | 0.692          | 0.692        |
| regulation of metabolic process             | 3          | 1           | 0.97         | 164                    | 0.692          | 0.692        |
| regulation of cellular metabolic process    | 3          | 1           | 0.97         | 165                    | 0.692          | 0.692        |
| regulation of cellular biosynthetic proc... | 3          | 1           | 0.97         | 166                    | 0.692          | 0.692        |
| RNA biosynthetic process                    | 3          | 1           | 0.97         | 167                    | 0.692          | 0.692        |
| regulation of transcription                 | 3          | 1           | 0.97         | 168                    | 0.692          | 0.692        |
| regulation of RNA metabolic process         | 3          | 1           | 0.97         | 169                    | 0.692          | 0.692        |
| regulation of macromolecule metabolic pr... | 3          | 1           | 0.97         | 170                    | 0.692          | 0.692        |
| anatomical structure development            | 7          | 2           | 2.25         | 171                    | 0.723          | 0.723        |
| embryonic development                       | 18         | 5           | 5.79         | 172                    | 0.757          | 0.757        |
| <b>primary metabolic process</b>            | <b>41</b>  | <b>12</b>   | <b>13.19</b> | <b>173</b>             | <b>0.758</b>   | <b>0.758</b> |
| multicellular organismal development        | 35         | 10          | 11.26        | 174                    | 0.776          | 0.776        |
| gene expression                             | 4          | 1           | 1.29         | 175                    | 0.794          | 0.794        |
| monocarboxylic acid metabolic process       | 4          | 1           | 1.29         | 176                    | 0.794          | 0.794        |
| cellular biopolymer biosynthetic process    | 4          | 1           | 1.29         | 177                    | 0.794          | 0.794        |
| biopolymer biosynthetic process             | 4          | 1           | 1.29         | 178                    | 0.794          | 0.794        |
| developmental process                       | 37         | 10          | 11.9         | 179                    | 0.848          | 0.848        |
| catabolic process                           | 5          | 1           | 1.61         | 180                    | 0.862          | 0.862        |
| regulation of cellular process              | 5          | 1           | 1.61         | 181                    | 0.862          | 0.862        |
| embryonic development ending in birth or... | 17         | 4           | 5.47         | 182                    | 0.867          | 0.867        |
| cellular biopolymer metabolic process       | 22         | 5           | 7.08         | 183                    | 0.908          | 0.908        |
| cellular macromolecule metabolic process    | 22         | 5           | 7.08         | 184                    | 0.908          | 0.908        |
| <b>metabolic process</b>                    | <b>56</b>  | <b>15</b>   | <b>18.02</b> | <b>185</b>             | <b>0.92</b>    | <b>0.92</b>  |
| aging                                       | 11         | 2           | 3.54         | 186                    | 0.924          | 0.924        |
| determination of adult life span            | 11         | 2           | 3.54         | 187                    | 0.924          | 0.924        |
| multicellular organismal aging              | 11         | 2           | 3.54         | 188                    | 0.924          | 0.924        |
| locomotion                                  | 11         | 2           | 3.54         | 189                    | 0.924          | 0.924        |
| protein metabolic process                   | 19         | 4           | 6.11         | 190                    | 0.924          | 0.924        |
| cellular protein metabolic process          | 19         | 4           | 6.11         | 191                    | 0.924          | 0.924        |
| macromolecule metabolic process             | 23         | 5           | 7.4          | 192                    | 0.93           | 0.93         |
| biopolymer metabolic process                | 23         | 5           | 7.4          | 193                    | 0.93           | 0.93         |
| proteolysis                                 | 15         | 2           | 4.83         | 194                    | 0.982          | 0.982        |
| <b>biological process</b>                   | <b>115</b> | <b>37</b>   | <b>37</b>    | <b>195</b>             | <b>1</b>       | <b>1</b>     |
| transition metal ion transport              | 1          | 0           | 0.32         | 196                    | 1              | 1            |
| M phase                                     | 1          | 0           | 0.32         | 197                    | 1              | 1            |
| cell fate specification                     | 1          | 0           | 0.32         | 198                    | 1              | 1            |
| morphogenesis of an epithelium              | 1          | 0           | 0.32         | 199                    | 1              | 1            |
| reproductive developmental process          | 2          | 0           | 0.64         | 200                    | 1              | 1            |
| polysaccharide metabolic process            | 1          | 0           | 0.32         | 201                    | 1              | 1            |
| chitin metabolic process                    | 1          | 0           | 0.32         | 202                    | 1              | 1            |
| chitin catabolic process                    | 1          | 0           | 0.32         | 203                    | 1              | 1            |
| amino sugar metabolic process               | 1          | 0           | 0.32         | 204                    | 1              | 1            |
| glucosamine metabolic process               | 1          | 0           | 0.32         | 205                    | 1              | 1            |
| glucosamine catabolic process               | 1          | 0           | 0.32         | 206                    | 1              | 1            |
| N-acetylglucosamine metabolic process       | 1          | 0           | 0.32         | 207                    | 1              | 1            |
| N-acetylglucosamine catabolic process       | 1          | 0           | 0.32         | 208                    | 1              | 1            |
| translation                                 | 1          | 0           | 0.32         | 209                    | 1              | 1            |
| protein folding                             | 1          | 0           | 0.32         | 210                    | 1              | 1            |
| glutamine metabolic process                 | 1          | 0           | 0.32         | 211                    | 1              | 1            |
| glutamine biosynthetic process              | 1          | 0           | 0.32         | 212                    | 1              | 1            |
| lipid metabolic process                     | 9          | 0           | 2.9          | 213                    | 1              | 1            |
| fatty acid metabolic process                | 3          | 0           | 0.97         | 214                    | 1              | 1            |
| fatty acid biosynthetic process             | 1          | 0           | 0.32         | 215                    | 1              | 1            |
| acyl-CoA metabolic process                  | 1          | 0           | 0.32         | 216                    | 1              | 1            |
| membrane lipid metabolic process            | 2          | 0           | 0.64         | 217                    | 1              | 1            |
| phospholipid metabolic process              | 2          | 0           | 0.64         | 218                    | 1              | 1            |
| sphingolipid metabolic process              | 2          | 0           | 0.64         | 219                    | 1              | 1            |
| sphingomyelin metabolic process             | 2          | 0           | 0.64         | 220                    | 1              | 1            |
| sphingomyelin catabolic process             | 2          | 0           | 0.64         | 221                    | 1              | 1            |
| iron ion transport                          | 1          | 0           | 0.32         | 222                    | 1              | 1            |
| cellular ion homeostasis                    | 1          | 0           | 0.32         | 223                    | 1              | 1            |
| cellular iron ion homeostasis               | 1          | 0           | 0.32         | 224                    | 1              | 1            |
| response to stress                          | 4          | 0           | 1.29         | 225                    | 1              | 1            |
| defense response                            | 2          | 0           | 0.64         | 226                    | 1              | 1            |
| ER-nuclear signaling pathway                | 2          | 0           | 0.64         | 227                    | 1              | 1            |

Table 9 (contd)

| Term                                        | Annotated | Significant | Expected | Rank in classic Fisher | classic Fisher | elim Fisher |
|---------------------------------------------|-----------|-------------|----------|------------------------|----------------|-------------|
| response to unfolded protein                | 2         | 0           | 0.64     | 228                    | 1              | 1           |
| cell cycle                                  | 1         | 0           | 0.32     | 229                    | 1              | 1           |
| chromosome segregation                      | 1         | 0           | 0.32     | 230                    | 1              | 1           |
| meiosis                                     | 1         | 0           | 0.32     | 231                    | 1              | 1           |
| cell communication                          | 3         | 0           | 0.97     | 232                    | 1              | 1           |
| signal transduction                         | 2         | 0           | 0.64     | 233                    | 1              | 1           |
| intracellular signaling cascade             | 2         | 0           | 0.64     | 234                    | 1              | 1           |
| pattern specification process               | 1         | 0           | 0.32     | 235                    | 1              | 1           |
| sex differentiation                         | 2         | 0           | 0.64     | 236                    | 1              | 1           |
| protein-based cuticle development           | 1         | 0           | 0.32     | 237                    | 1              | 1           |
| lipid biosynthetic process                  | 1         | 0           | 0.32     | 238                    | 1              | 1           |
| glutamine family amino acid metabolic pr... | 1         | 0           | 0.32     | 239                    | 1              | 1           |
| glutamine family amino acid biosynthetic... | 1         | 0           | 0.32     | 240                    | 1              | 1           |
| phospholipid catabolic process              | 2         | 0           | 0.64     | 241                    | 1              | 1           |
| response to biotic stimulus                 | 2         | 0           | 0.64     | 242                    | 1              | 1           |
| embryonic pattern specification             | 1         | 0           | 0.32     | 243                    | 1              | 1           |
| gas transport                               | 1         | 0           | 0.32     | 244                    | 1              | 1           |
| oxygen transport                            | 1         | 0           | 0.32     | 245                    | 1              | 1           |
| di-, tri-valent inorganic cation transpo... | 1         | 0           | 0.32     | 246                    | 1              | 1           |
| lipid catabolic process                     | 2         | 0           | 0.64     | 247                    | 1              | 1           |
| organic acid biosynthetic process           | 1         | 0           | 0.32     | 248                    | 1              | 1           |
| protein processing                          | 1         | 0           | 0.32     | 249                    | 1              | 1           |
| intein-mediated protein splicing            | 1         | 0           | 0.32     | 250                    | 1              | 1           |
| molting cycle, protein-based cuticle        | 1         | 0           | 0.32     | 251                    | 1              | 1           |
| molting cycle, collagen and cuticulin-ba... | 1         | 0           | 0.32     | 252                    | 1              | 1           |
| cellular homeostasis                        | 1         | 0           | 0.32     | 253                    | 1              | 1           |
| cell cycle process                          | 1         | 0           | 0.32     | 254                    | 1              | 1           |
| cell cycle phase                            | 1         | 0           | 0.32     | 255                    | 1              | 1           |
| cellular cation homeostasis                 | 1         | 0           | 0.32     | 256                    | 1              | 1           |
| cellular di-, tri-valent inorganic catio... | 1         | 0           | 0.32     | 257                    | 1              | 1           |
| sphingolipid catabolic process              | 2         | 0           | 0.64     | 258                    | 1              | 1           |
| cell differentiation                        | 1         | 0           | 0.32     | 259                    | 1              | 1           |
| protein splicing                            | 1         | 0           | 0.32     | 260                    | 1              | 1           |
| endoplasmic reticulum unfolded protein r... | 2         | 0           | 0.64     | 261                    | 1              | 1           |
| cellular response to stress                 | 2         | 0           | 0.64     | 262                    | 1              | 1           |
| cellular response to unfolded protein       | 2         | 0           | 0.64     | 263                    | 1              | 1           |
| response to endoplasmic reticulum stress    | 2         | 0           | 0.64     | 264                    | 1              | 1           |
| multicellular organism growth               | 1         | 0           | 0.32     | 265                    | 1              | 1           |
| collagen and cuticulin-based cuticle dev... | 1         | 0           | 0.32     | 266                    | 1              | 1           |
| regulation of locomotion                    | 1         | 0           | 0.32     | 267                    | 1              | 1           |
| regulation of multicellular organism gro... | 1         | 0           | 0.32     | 268                    | 1              | 1           |
| positive regulation of locomotion           | 1         | 0           | 0.32     | 269                    | 1              | 1           |
| positive regulation of multicellular org... | 1         | 0           | 0.32     | 270                    | 1              | 1           |
| hermaphrodite genitalia development         | 2         | 0           | 0.64     | 271                    | 1              | 1           |
| response to chemical stimulus               | 2         | 0           | 0.64     | 272                    | 1              | 1           |
| molting cycle                               | 1         | 0           | 0.32     | 273                    | 1              | 1           |
| cuticle development                         | 1         | 0           | 0.32     | 274                    | 1              | 1           |
| homeostatic process                         | 1         | 0           | 0.32     | 275                    | 1              | 1           |
| cellular lipid catabolic process            | 2         | 0           | 0.64     | 276                    | 1              | 1           |
| cellular catabolic process                  | 2         | 0           | 0.64     | 277                    | 1              | 1           |
| cellular lipid metabolic process            | 5         | 0           | 1.61     | 278                    | 1              | 1           |
| meiotic chromosome segregation              | 1         | 0           | 0.32     | 279                    | 1              | 1           |
| cell fate commitment                        | 1         | 0           | 0.32     | 280                    | 1              | 1           |
| amino sugar catabolic process               | 1         | 0           | 0.32     | 281                    | 1              | 1           |
| carboxylic acid biosynthetic process        | 1         | 0           | 0.32     | 282                    | 1              | 1           |
| membrane lipid catabolic process            | 2         | 0           | 0.64     | 283                    | 1              | 1           |
| organ development                           | 2         | 0           | 0.64     | 284                    | 1              | 1           |
| system development                          | 2         | 0           | 0.64     | 285                    | 1              | 1           |
| genitalia development                       | 2         | 0           | 0.64     | 286                    | 1              | 1           |
| cellular developmental process              | 1         | 0           | 0.32     | 287                    | 1              | 1           |
| chemical homeostasis                        | 1         | 0           | 0.32     | 288                    | 1              | 1           |
| ion homeostasis                             | 1         | 0           | 0.32     | 289                    | 1              | 1           |
| regulation of multicellular organismal p... | 1         | 0           | 0.32     | 290                    | 1              | 1           |
| positive regulation of multicellular org... | 1         | 0           | 0.32     | 291                    | 1              | 1           |
| meiotic cell cycle                          | 1         | 0           | 0.32     | 292                    | 1              | 1           |
| M phase of meiotic cell cycle               | 1         | 0           | 0.32     | 293                    | 1              | 1           |
| cellular response to stimulus               | 2         | 0           | 0.64     | 294                    | 1              | 1           |
| response to protein stimulus                | 2         | 0           | 0.64     | 295                    | 1              | 1           |
| di-, tri-valent inorganic cation homeost... | 1         | 0           | 0.32     | 296                    | 1              | 1           |
| iron ion homeostasis                        | 1         | 0           | 0.32     | 297                    | 1              | 1           |
| cation homeostasis                          | 1         | 0           | 0.32     | 298                    | 1              | 1           |
| cellular chemical homeostasis               | 1         | 0           | 0.32     | 299                    | 1              | 1           |
| transmembrane transport                     | 1         | 0           | 0.32     | 300                    | 1              | 1           |
| oxidation reduction                         | 1         | 0           | 0.32     | 301                    | 1              | 1           |
| regulation of biological quality            | 1         | 0           | 0.32     | 302                    | 1              | 1           |

Table 9 (contd)
